# Supplementary material for: Iron-catalyzed tetrasubstituted alkene formation from alkynes and sodium sulfinates
Source: Royal Society of Chemistry journal article supplement (doi:10.1039/c4ob00816b), 2014-06-27
Supplement: c4ob00816b1.pdf [file c4ob00816b1.pdf]

**Supporting information for**

**Iron-catalyzed tetrasubstituted alkenes formation from alkynes and sodium sulfinates**

Saiwen Liu,<sup>a</sup> Lichang Tang,<sup>a</sup> Hui Chen,<sup>a</sup> Feng Zhao,<sup>a</sup> Guo-Jun Deng<sup>a,b\*</sup>

<sup>a</sup> Key Laboratory of Environmentally Friendly Chemistry and Application of Ministry of Education, College of Chemistry, Xiangtan University, Xiangtan 411105, China; Fax: (+86)-731-58292251; e-mail: gjdeng@xtu.edu.cn

<sup>b</sup> Key Laboratory of Molecular Recognition and Function, Institute of Chemistry, Chinese Academy of Sciences, Beijing 100080, China.

**Table of Contents**

|                                                                  |              |
|------------------------------------------------------------------|--------------|
| <b>1. General information</b>                                    | <b>2</b>     |
| <b>2. General experimental procedure</b>                         | <b>2</b>     |
| <b>3. Characterization data of products</b>                      | <b>3-14</b>  |
| <b>4. References</b>                                             | <b>14</b>    |
| <b>5. Copies of <sup>1</sup>H and <sup>13</sup>C NMR spectra</b> | <b>15-30</b> |
| <b>6. X-ray crystallographic structures of 3d and 3q</b>         | <b>31-32</b> |

**General information:**

All experiments were carried out under an atmosphere of argon. Flash column chromatography was performed over silica gel 40-60  $\mu\text{m}$ .  $^1\text{H}$  NMR and  $^{13}\text{C}$  NMR spectra were recorded on Bruker-AV (400 and 100 MHz, respectively) instrument internally referenced to  $\text{SiMe}_4$  or chloroform signals. MS analyses were performed on Agilent 5975 GC-MS instrument (EI). The new compounds were characterized by  $^1\text{H}$  NMR,  $^{13}\text{C}$  NMR, MS, HRMS and X-RD. The structure of known compounds were further corroborated by comparing their  $^1\text{H}$  NMR,  $^{13}\text{C}$  NMR data and MS data with those of literature. Unless otherwise noted, all reagents were obtained from commercial suppliers and used without further purification. Aromatic sulfinic acid sodium salts **1a**, **1b**, **1f** and **1j** were purchased from Alfa Aesar, others were prepared according to the literature procedures. Solvents were used as received without further purification. Alkynes **1a** were purchased from Alfa Aesar, others were prepared according to the literature procedures.

**General procedure: 1,1,2-triphenylethene (3a)**

A 10 mL reaction vessel was charged with sodium benzenesulfinate (**1a**, 160 mg, 0.8 mmol), diphenylethyne (**2a**, 35.6 mg, 0.2 mmol),  $\text{FeSO}_4 \cdot 7\text{H}_2\text{O}$  (0.6 mg, 0.002 mmol), and 1,8-naphthalenediamine (0.9 mg, 0.004 mmol). The sealed reaction vessel was purged with argon three times and trifluoroacetic acid (0.2 mmol), methanesulfonic acid (0.2 mmol) and a mixture of 1,4-dioxane (0.3 mL) and  $\text{H}_2\text{O}$  (0.1 mL) were added by syringe. The resulting solution was heated to 120  $^\circ\text{C}$  for 24 h. After cooling to room temperature, the volatiles were removed under vacuum and the residue was purified by column chromatography (silica gel, petroleum ether/ethyl acetate = 98:2) to give **3a** in 78% yield (56.8 mg) as light yellow solid, mp 147-148.5  $^\circ\text{C}$ .

**Phenyl(1,2,2-triphenylvinyl)sulfane (3a, CAS: 69719-58-0)** <sup>[1]</sup>

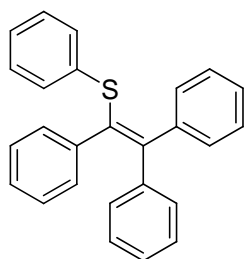

<sup>1</sup>H NMR (400 MHz, CDCl<sub>3</sub>, ppm)  $\delta$  7.39-7.29 (m, 7H), 7.19-6.98 (m, 13H); <sup>13</sup>C NMR (100 MHz, CDCl<sub>3</sub>, ppm)  $\delta$  146.2, 143.7, 142.5, 139.3, 135.7, 134.2, 131.1, 130.7, 129.8, 129.6, 128.4, 128.1, 127.6, 127.5, 127.2, 127.0, 126.6, 125.8; MS (EI) *m/z* (%) 77, 178, 239, 255, 364 (100).

***p*-Tolyl(1,2,2-tris-tolylvinyl)sulfane (3b)**

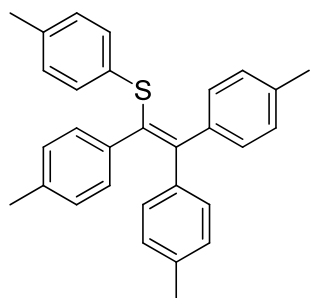

The reaction was conducted with sodium 4-methylbenzenesulfinate (**1b**, 142.4 mg, 0.8 mmol) and 1,2-dip-tolyne (**2b**, 41.2 mg, 0.2 mmol). The crude mixture was purified by flash column chromatography on silica gel (petroleum ether/ethyl acetate = 98:2) to provide 60.5 mg, 72% yield of **3b** as light yellow solid, mp 181-182.5 °C.

<sup>1</sup>H NMR (400 MHz, CDCl<sub>3</sub>, ppm)  $\delta$  7.23-7.18 (m, 4H), 7.11-7.04 (m, 4H), 6.91-6.81 (m, 8H), 2.34 (s, 3H), 2.22-2.17 (m, 9H); <sup>13</sup>C NMR (100 MHz, CDCl<sub>3</sub>, ppm)  $\delta$  145.9, 141.5, 140.0, 136.7, 136.4, 136.1, 135.3, 133.1, 132.7, 130.9, 130.7, 129.5, 129.2, 128.8, 128.3, 128.3, 125.2, 21.3, 21.1, 20.9; MS (EI) *m/z* (%) 189, 252, 282, 297 (100), 420; HRMS calcd. for: C<sub>30</sub>H<sub>29</sub>S [M+H]<sup>+</sup>: 421.19845, found 421.19833.

**(4-Ethylphenyl)(1,2,2-tris(4-ethylphenyl)vinyl)sulfane (3c)**

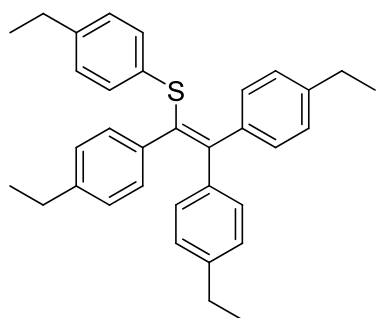

The reaction was conducted with sodium 4-ethylbenzenesulfinate (**1c**, 153.6 mg, 0.8 mmol) and 1,2-bis(4-ethylphenyl)ethyne (**2c**, 46.8 mg, 0.2 mmol). The crude mixture was purified by flash column chromatography on silica gel (petroleum ether/ethyl acetate = 98:2) to provide 47.7 mg, 50% yield of **3c** as light yellow oil.

$^1\text{H}$  NMR (400 MHz,  $\text{CDCl}_3$ , ppm)  $\delta$  7.24-7.19 (m, 4H), 7.12-7.05 (m, 4H), 6.92-6.83 (m, 8H), 2.64 (q,  $J = 8.0$  Hz, 2H), 2.55-2.45 (m, 6H), 1.24 (t,  $J = 8.0$  Hz, 3H), 1.16-1.08 (m, 9H);  $^{13}\text{C}$  NMR (100 MHz,  $\text{CDCl}_3$ , ppm)  $\delta$  145.6, 142.9, 142.7, 142.3, 141.7, 141.6, 140.3, 137.1, 133.5, 133.1, 131.0, 130.7, 129.8, 129.6, 127.9, 127.4, 127.0, 126.9, 28.6, 28.4, 28.3, 15.3, 15.2, 15.1; HRMS calcd. for:  $\text{C}_{34}\text{H}_{37}\text{S}$   $[\text{M}+\text{H}]^+$ : 477.26105, found 477.26110.

**(4-Methoxyphenyl)(1,2-tris(4-methoxyphenyl)vinyl)sulfane (3d)**

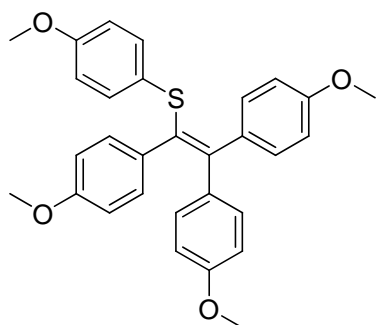

The reaction was conducted with sodium 4-methoxybenzenesulfinate (**1d**, 155.2 mg, 0.8 mmol) and 1,2-bis(4-methoxyphenyl)ethyne (**2d**, 47.6 mg, 0.2 mmol). The crude mixture was purified by flash column chromatography on silica gel (petroleum ether/ethyl acetate = 9:1) to provide 46.5 mg, 48% yield of **3d** as light yellow solid, mp 149-150 °C.

$^1\text{H}$  NMR (400 MHz,  $\text{CDCl}_3$ , ppm)  $\delta$  7.30-7.28 (m, 2H), 7.18 (d,  $J = 8.0$  Hz, 2H), 7.09 (d,  $J = 8.0$  Hz, 2H), 6.87-6.84 (m, 4H), 6.66-6.55 (m, 6H), 3.81-3.69 (m, 12H);  $^{13}\text{C}$  NMR (100 MHz,  $\text{CDCl}_3$ , ppm)  $\delta$  158.7, 158.3, 158.2, 158.0, 143.3, 136.8, 135.6, 133.1, 132.2, 132.2, 132.0, 131.9, 131.0,

126.8, 114.2, 113.5, 113.1, 113.1, 55.19, 55.17, 55.05, 55.03; HRMS calcd. for: C<sub>30</sub>H<sub>28</sub>O<sub>4</sub>S [M]: 484.17028, found 484.16989.

**(4-Fluorophenyl)(1,2,2-tris(4-fluorophenyl)vinyl)sulfane (3e)**

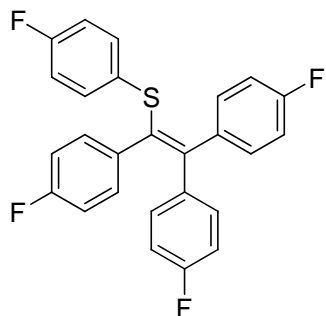

The reaction was conducted with sodium 4-fluorobenzenesulfinate (**1e**, 145.6 mg, 0.8 mmol) and 1,2-bis(4-fluorophenyl)ethyne (**2e**, 42.8 mg, 0.2 mmol). The crude mixture was purified by flash column chromatography on silica gel (petroleum ether/ethyl acetate = 98:2) to provide 61.1 mg, 70% yield of **3e** as light yellow solid, mp 118.5-119.5 °C.

<sup>1</sup>H NMR (400 MHz, CDCl<sub>3</sub>, ppm) δ 7.34-7.30 (m, 2H), 7.21-7.17 (m, 2H), 7.13-7.10 (m, 2H), 7.05-7.01 (m, 2H), 6.90-6.87 (m, 2H), 6.83-6.72 (m, 6H); <sup>13</sup>C NMR (100 MHz, CDCl<sub>3</sub>, ppm) δ 162.1 (d, *J* = 240.0 Hz), 161.8 (d, *J* = 240.0 Hz), 161.7 (d, *J* = 240.0 Hz), 161.6 (d, *J* = 240.0 Hz), 142.8, 139.0 (d, *J* = 3.3 Hz), 138.0 (d, *J* = 3.3 Hz), 134.7 (d, *J* = 3.6 Hz), 134.6, 132.6 (d, *J* = 8.1 Hz), 132.2 (d, *J* = 8.0 Hz), 131.4 (d, *J* = 7.9 Hz), 129.8 (d, *J* = 3.4 Hz), 115.8 (d, *J* = 21.9 Hz), 115.3 (d, *J* = 21.4 Hz), 114.9 (d, *J* = 21.5 Hz); MS (EI) *m/z* (%) 214, 268, 288, 309 (100), 436. HRMS calcd. for: C<sub>26</sub>H<sub>16</sub>F<sub>4</sub>S [M]: 436.0914, found 436.0909.

**(4-Chlorophenyl)(1,2,2-tris(4-chlorophenyl)vinyl)sulfane (3f)**

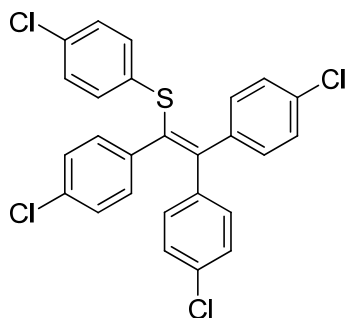

The reaction was conducted with sodium 4-chlorobenzenesulfinate (**1f**, 158.4 mg, 0.8 mmol) and 1,2-bis(4-chlorophenyl)ethyne (**2f**, 49.4 mg, 0.2 mmol). The crude mixture was purified by flash

column chromatography on silica gel (petroleum ether/ethyl acetate = 98:2) to provide 60.3 mg, 60% yield of **3f** as yellow solid, mp 168.5-169.5 °C.

<sup>1</sup>H NMR (400 MHz, CDCl<sub>3</sub>, ppm) δ 7.31-7.29 (m, 2.5H), 7.24-7.04 (m, 11.5H), 6.86-6.84 (m, 2H);

<sup>13</sup>C NMR (100 MHz, CDCl<sub>3</sub>, ppm) δ 144.3, 141.3, 140.0, 137.0, 134.1, 133.7, 133.5, 133.3, 133.3, 132.6, 132.1, 131.9, 131.1, 130.9, 128.9, 128.6, 128.3; HRMS calcd. for: C<sub>26</sub>H<sub>16</sub>Cl<sub>4</sub>S [M]: 501.96918, found 501.96884.

#### (1,2-Diphenyl-2-p-tolylvinyl)(p-tolyl)sulfane (**3g+4g**)

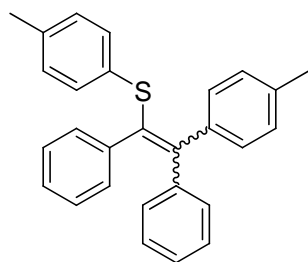

The reaction was conducted with sodium 4-methylbenzenesulfinate (**1b**, 142.4 mg, 0.8 mmol) and diphenylethyne (**2a**, 35.6 mg, 0.2 mmol). The crude mixture was purified by flash column chromatography on silica gel (petroleum ether/ethyl acetate = 98:2) to provide 58.1 mg, 74% yield of **3g+4g** as light yellow solid. The ratio of **3g/4g** is 1.2:1.

<sup>1</sup>H NMR (400 MHz, CDCl<sub>3</sub>, ppm) δ 7.38-7.26 (m, 5.65H), 7.07-6.84 (m, 12.36H), 2.35 (s, 1.35H = 0.45×3H), 2.21-2.19 (m, 4.65H); MS (EI) *m/z* (%) 91, 191, 253, 269, 392 (100); HRMS calcd. for: C<sub>28</sub>H<sub>25</sub>S [M+H]<sup>+</sup>: 393.16716, found 393.16703.

#### (4-Isopropylphenyl)(2-(4-isopropylphenyl)-1,2-diphenylvinyl)sulfane (**3h+4h**)

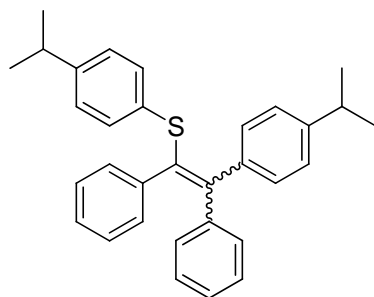

The reaction was conducted with sodium 4-isopropylbenzenesulfinate (**1g**, 164.8 mg, 0.8 mmol) and diphenylethyne (**2a**, 35.6 mg, 0.2 mmol). The crude mixture was purified by flash column chromatography on silica gel (petroleum ether/ethyl acetate = 98:2) to provide 44.9 mg, 50% yield

of **3h+4h** as light yellow solid. The ratio of **3h/4h** is 1.2:1.

$^1\text{H}$  NMR (400 MHz,  $\text{CDCl}_3$ , ppm)  $\delta$  7.37-7.28 (m, 4.77H), 7.25-7.24 (m, 1H), 7.14-6.84 (m, 12.22H), 2.92-2.85 (m, 0.46H = 0.23 $\times$ 2H), 2.79-2.71 (m, 1.54H = 0.77 $\times$ 2H), 1.25 (d,  $J$  = 8.0 Hz, 2.76H = 0.23 $\times$ 12H), 1.15-1.12 (m, 9.24H = 0.77 $\times$ 12 H); HRMS calcd. for:  $\text{C}_{32}\text{H}_{33}\text{S}$   $[\text{M}+\text{H}]^+$ : 449.22975, found 449.22949.

**(4-Methoxyphenyl)(2-(4-methoxyphenyl)-1,2-diphenylvinyl)sulfane (3i+4i)**

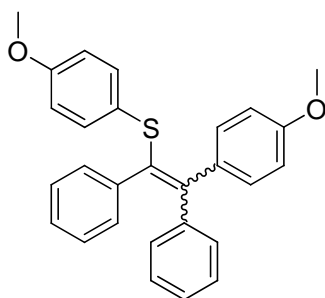

The reaction was conducted with sodium 4-methoxybenzenesulfinate (**1d**, 155.2 mg, 0.8 mmol) and diphenylethyne (**2a**, 35.6 mg, 0.2 mmol). The crude mixture was purified by flash column chromatography on silica gel (petroleum ether/ethyl acetate = 95:5) to provide 56.9 mg, 67% yield of **3i+4i** as light yellow solid. The ratio of **3i/4i** is 1:1.

$^1\text{H}$  NMR (400 MHz,  $\text{CDCl}_3$ , ppm)  $\delta$  7.40-7.28 (m, 3.94H), 7.25-7.20 (m, 1.4H), 7.11-6.84 (m, 9.68H), 6.64-6.55 (m, 3H), 3.81 (m, 1.5H = 0.25 $\times$ 6H), 3.68 (m, 4.5H = 0.75 $\times$ 6H); HRMS calcd. for:  $\text{C}_{28}\text{H}_{25}\text{O}_2\text{S}$   $[\text{M}+\text{H}]^+$ : 425.15698, found 425.15652.

**(1,2-Dip-tolyl-2-(4-(trifluoromethyl)phenyl)vinyl)(4-(trifluoromethyl)phenyl)sulfane (3j+4j)**

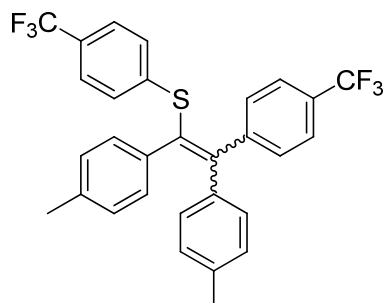

The reaction was conducted with sodium 4-(trifluoromethyl)benzenesulfinate (**1h**, 185.6 mg, 0.8 mmol) and 1,2-dip-tolyne (**2b**, 41.2 mg, 0.2 mmol). The crude mixture was purified by flash column chromatography on silica gel (petroleum ether/ethyl acetate = 98:2) to provide 65.5 mg,

62% yield of **3j+4j** as light yellow solid. The ratio of **3j/4j** is 1:1.

<sup>1</sup>H NMR (400 MHz, CDCl<sub>3</sub>, ppm) δ 7.53-7.51 (m, 1H), 7.40-7.31 (m, 4H), 7.24-7.07 (m, 7H), 6.92-6.82 (m, 4H), 2.35 (s, 1.5H = 0.25×6H), 2.25-2.21 (m, 4.5H = 0.75×6H); MS (EI) *m/z* (%) 189, 252, 336, 351 (100), 528; HRMS calcd. for: C<sub>30</sub>H<sub>22</sub>F<sub>6</sub>S [M]: 528.13409, found 528.13403.

**(1,2-Dip-tolyl-2-(4-(trifluoromethoxy)phenyl)vinyl)(4-(trifluoromethoxy)phenyl)sulfane**  
**(3k+4k)**

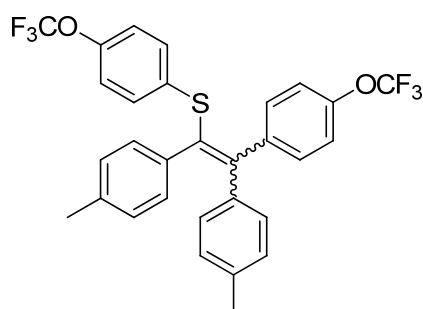

The reaction was conducted with sodium 4-(trifluoromethoxy)benzenesulfinate (**1i**, 198.4 mg, 0.8 mmol) and 1,2-dip-tolylethyne (**2b**, 41.2 mg, 0.2 mmol). The crude mixture was purified by flash column chromatography on silica gel (petroleum ether/ethyl acetate = 95:5) to provide 78.5 mg, 70% yield of **3k+4k** as light yellow oil. The ratio of **3k/4k** is 1:1.

<sup>1</sup>H NMR (400 MHz, CDCl<sub>3</sub>, ppm) δ 7.30-7.28 (m, 1H), 7.21-7.08 (m, 7H), 6.98-6.81 (m, 8H), 2.35 (s, 1.5H = 0.25×6H), 2.23-2.20 (m, 4.5H = 0.75×6H); HRMS calcd. for: C<sub>30</sub>H<sub>22</sub>F<sub>6</sub>O<sub>2</sub>S [M]: 560.12392, found 560.12403.

**(4-Fluorophenyl)(2-(4-fluorophenyl)-1,2-dip-tolylvinyl)sulfane (3l+4l)**

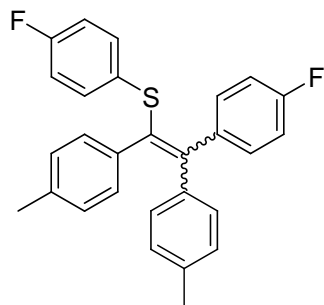

The reaction was conducted with sodium 4-fluorobenzenesulfinate (**1e**, 145.6 mg, 0.8 mmol) and



1,2-dip-tolylythyne (**2b**, 41.2 mg, 0.2 mmol). The crude mixture was purified by flash column chromatography on silica gel (petroleum ether/ethyl acetate = 98:2) to provide 58.3 mg, 68% yield of **3l+4l** as light yellow solid. The ratio of **3l/4l** is 1:1.

<sup>1</sup>H NMR (400 MHz, CDCl<sub>3</sub>, ppm) δ 7.31-7.27 (m, 1H), 7.24-7.09 (m, 6H), 7.00-6.71 (m, 9H), 2.35 (s, 1.5H = 0.25×6H), 2.22-2.18 (m, 4.5H = 0.75×6H); MS (EI) *m/z* (%) 209, 270, 286, 301 (100), 428. HRMS calcd. for: C<sub>28</sub>H<sub>22</sub>F<sub>2</sub>S [M]: 428.14048, found 428.14017.

**(4-Chlorophenyl)(2-(4-chlorophenyl)-1,2-dip-tolylvinyl)sulfane (3m+4m)**

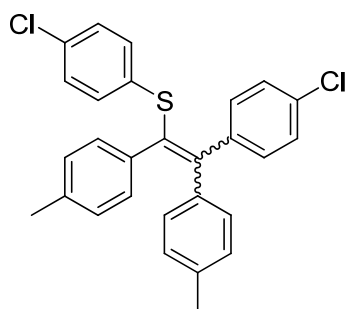

The reaction was conducted with sodium 4-chlorobenzenesulfinate (**1f**, 158.4 mg, 0.8 mmol) and 1,2-dip-tolylythyne (**2b**, 41.2 mg, 0.2 mmol). The crude mixture was purified by flash column chromatography on silica gel (petroleum ether/ethyl acetate = 98:2) to provide 64.6 mg, 70% yield of **3m+4m** as light yellow solid. The ratio of **3m/4m** is 1:1.

<sup>1</sup>H NMR (400 MHz, CDCl<sub>3</sub>, ppm) δ 7.25-7.01 (m, 11H), 6.89-6.80 (m, 5H), 2.35 (s, 1.5H = 0.25×6H), 2.23-2.20 (m, 4.5H = 0.75×6H); MS (EI) *m/z* (%) 189, 252, 282, 317 (100), 460; HRMS calcd. for: C<sub>28</sub>H<sub>22</sub>Cl<sub>2</sub>S [M]: 460.08138, found 460.08134.

**(4-Bromophenyl)(2-(4-bromophenyl)-1,2-dip-tolylvinyl)sulfane (3n+4n)**

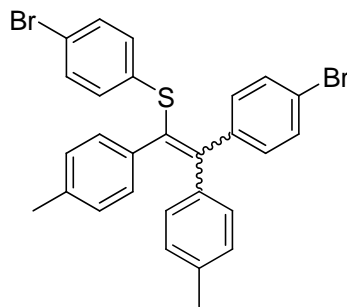

The reaction was conducted with sodium 4-bromobenzenesulfinate (**1j**, 194.4 mg, 0.8 mmol) and 1,2-dip-tolylythyne (**2b**, 41.2 mg, 0.2 mmol). The crude mixture was purified by flash column

chromatography on silica gel (petroleum ether/ethyl acetate = 98:2) to provide 79.3 mg, 72% yield of **3n+4n** as light yellow solid. The ratio of **3n/4n** is 1:1.

<sup>1</sup>H NMR (400 MHz, CDCl<sub>3</sub>, ppm) δ 7.42-7.40 (m, 1H), 7.22-7.11 (m, 8H), 7.01-6.99 (m, 2H), 6.89-6.80 (m, 5H), 2.35 (s, 1.5H = 0.25×6H), 2.23-2.21 (m, 4.5H = 0.75×6H); HRMS calcd. for: C<sub>28</sub>H<sub>22</sub>Br<sub>2</sub>S [M]: 549.97830, found 549.97816.

#### 4-((2-(4-Cyanophenyl)-1,2-diphenylvinyl)thio)benzotrile (**3o+4o**)

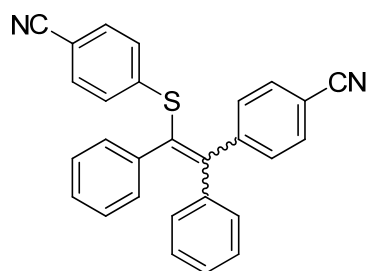

The reaction was conducted with sodium 4-cyanobenzenesulfinate (**1k**, 151.2 mg, 0.8 mmol) and diphenylethyne (**2a**, 35.6 mg, 0.2 mmol). The crude mixture was purified by flash column chromatography on silica gel (petroleum ether/ethyl acetate = 95:5) to provide 53.9 mg, 65% yield of **3o+4o** as light yellow oil. The ratio of **3o/4o** is 1:1.

<sup>1</sup>H NMR (400 MHz, CDCl<sub>3</sub>, ppm) δ 7.61-7.27 (m, 10.4H), 7.22-6.92 (m, 7.65H); MS (EI) *m/z* (%) 77, 178, 252, 280 (100), 414.

#### Phenyl(2-phenyl-1,2-dip-tolylvinyl)sulfane (**3p+4p**)

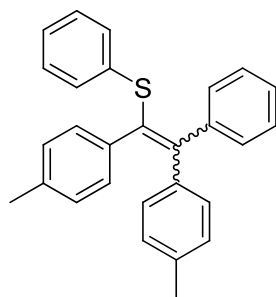

The reaction was conducted with sodium benzenesulfinate (**1a**, 160 mg, 0.8 mmol) and 1,2-dip-tolyne (**2b**, 41.2 mg, 0.2 mmol). The crude mixture was purified by flash column chromatography on silica gel (petroleum ether/ethyl acetate = 98:2) to provide 55.7 mg, 71% yield of **3p+4p** as light yellow solid. The ratio of **3p/4p** is 1:1.

<sup>1</sup>H NMR (400 MHz, CDCl<sub>3</sub>, ppm) δ 7.35-7.26 (m, 2.5H), 7.22-6.98 (m, 11.5H), 6.86-6.80 (m,

4H), 2.33 (s, 1.5H = 0.25×6H), 2.22-2.15 (m, 4.5H = 0.75×6H); MS (EI)  $m/z$  (%) 91, 191, 253, 269, 392 (100); HRMS calcd. for: C<sub>28</sub>H<sub>25</sub>S [M+H]<sup>+</sup>: 393.16715, found 393.16687.

**(1,2-Bis(4-ethylphenyl)-2-phenylvinyl)(phenyl)sulfane (3q+4q)**

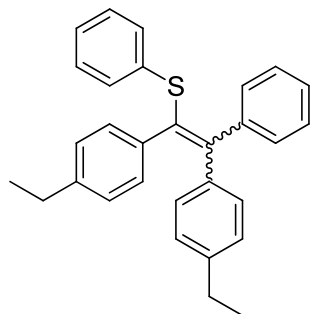

The reaction was conducted with sodium benzenesulfinate (**1a**, 160 mg, 0.8 mmol) and 1,2-bis(4-ethylphenyl)ethyne (**2c**, 46.8 mg, 0.2 mmol). The crude mixture was purified by flash column chromatography on silica gel (petroleum ether/ethyl acetate = 98:2) to provide 61.4 mg, 73% yield of **3q+4q** as light yellow solid. The ratio of **3q/4q** is 1:1.1.

<sup>1</sup>H NMR (400 MHz, CDCl<sub>3</sub>, ppm)  $\delta$  7.35-7.27 (m, 2.7H), 7.23-6.99 (m, 11.41H), 6.87-6.82 (m, 3.9H), 2.64 (q,  $J$  = 8.0 Hz, 1.04H = 0.26×4H), 2.55-2.44 (m, 2.96H = 0.74×4H), 1.24 (t,  $J$  = 7.6 Hz, 1.56H = 0.26×6H), 1.16-1.07 (m, 4.44H = 0.74×6H); MS (EI)  $m/z$  (%) 253, 267, 282, 311, 420 (100); HRMS calcd. for: C<sub>30</sub>H<sub>29</sub>S [M+H]<sup>+</sup>: 421.19845, found 421.19769.

**(1,2-Bis(4-methoxyphenyl)-2-phenylvinyl)(phenyl)sulfane (3r+4r)**

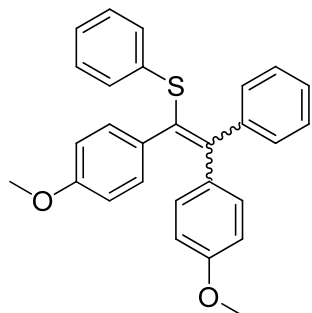

The reaction was conducted with sodium benzenesulfinate (**1a**, 160 mg, 0.8 mmol) and 1,2-bis(4-methoxyphenyl)ethyne (**2d**, 47.6 mg, 0.2 mmol). The crude mixture was purified by flash column chromatography on silica gel (petroleum ether/ethyl acetate = 95:5) to provide 57.7 mg, 68% yield of **3r+4r** as light yellow solid. The ratio of **3r/4r** is 1:1.

<sup>1</sup>H NMR (400 MHz, CDCl<sub>3</sub>, ppm)  $\delta$  7.35-7.27 (m, 3.01H), 7.24-6.81 (m, 12H), 6.62-6.53 (m, 3H),

3.79 (s, 1.5H = 0.25×6H), 3.72-3.67 (m, 4.5H = 0.75×6H).

**(E)-(1,2-Bis(4-methoxyphenyl)-2-phenylvinyl)(phenyl)sulfane (3r)**

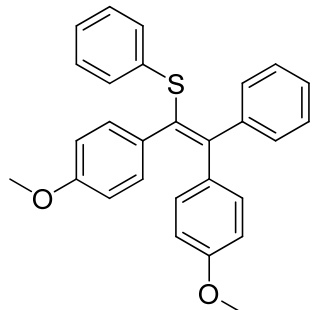

The reaction was conducted with sodium benzenesulfinate (**1a**, 160 mg, 0.8 mmol) and 1,2-bis(4-methoxyphenyl)ethyne (**2d**, 47.6 mg, 0.2 mmol). The crude mixture was purified by flash column chromatography on silica gel (petroleum ether/ethyl acetate = 95:5) to provide 28.9 mg, 34% yield of **3r** as light yellow solid, mp 151-152.5 °C.

<sup>1</sup>H NMR (400 MHz, CDCl<sub>3</sub>, ppm) δ 7.35-7.27 (m, 6H), 7.12-6.98 (m, 6H), 6.90-6.88 (m, 2H), 6.62-6.57 (m, 4H), 3.71 (s, *J* = 12.0 Hz, 6H); <sup>13</sup>C NMR (100 MHz, CDCl<sub>3</sub>, ppm) δ 158.4, 158.2, 145.4, 144.4, 136.4, 135.2, 132.3, 132.1, 131.9, 130.9, 129.6, 129.2, 128.4, 128.0, 127.7, 127.1, 125.5, 113.2, 55.09, 55.06; HRMS calcd. for: C<sub>28</sub>H<sub>25</sub>O<sub>2</sub>S [M+H]<sup>+</sup>: 425.15698, found 425.15652.

**(1,2-Bis(4-fluorophenyl)-2-p-tolylvinyl)(p-tolyl)sulfane (3s+4s)**

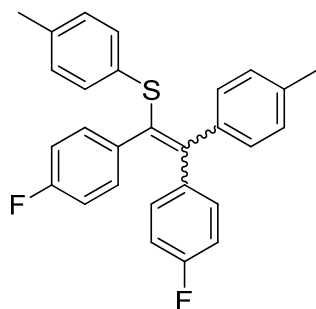

The reaction was conducted with sodium 4-methylbenzenesulfinate (**1b**, 142.4 mg, 0.8 mmol) and 1,2-bis(4-fluorophenyl)ethyne (**2e**, 42.8 mg, 0.2 mmol). The crude mixture was purified by flash column chromatography on silica gel (petroleum ether/ethyl acetate = 98:2) to provide 61.7 mg, 72% yield of **3s+4s** as light yellow solid. The ratio of **3s/4s** is 1:1.

<sup>1</sup>H NMR (400 MHz, CDCl<sub>3</sub>, ppm) δ 7.35-7.27 (m, 1.97H), 7.23-6.69 (m, 14.03H), 2.35 (s, 1.5H = 0.25×6H), 2.23-2.21 (m, 4.5H = 0.75×6H); MS (EI) *m/z* (%) 91, 207, 290, 305, 428 (100). HRMS

calcd. for: C<sub>28</sub>H<sub>23</sub>F<sub>2</sub>S [M+H]<sup>+</sup>: 429.14830, found 429.14813.

**(1,2-Bis(4-chlorophenyl)-2-p-tolylvinyl)(p-tolyl)sulfane (3t+4t)**

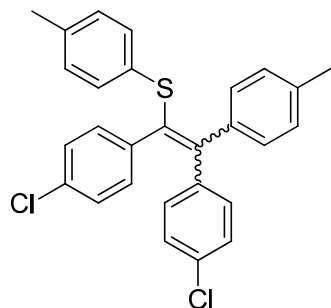

The reaction was conducted with sodium 4-methylbenzenesulfinate (**1b**, 142.4 mg, 0.8 mmol) and 1,2-bis(4-chlorophenyl)ethyne (**2f**, 49.4 mg, 0.2 mmol). The crude mixture was purified by flash column chromatography on silica gel (petroleum ether/ethyl acetate = 98:2) to provide 72.0 mg, 78% yield of **3t+4t** as light yellow solid. The ratio of **3t/4t** is 1:1.

<sup>1</sup>H NMR (400 MHz, CDCl<sub>3</sub>, ppm) δ 7.30-7.27 (m, 2.07H), 7.24-6.79 (m, 13.92H), 2.35 (s, 1.5H = 0.25×6H), 2.24-2.22 (m, 4.5H = 0.75×6H); MS (EI) *m/z* (%) 77, 207, 252 (100), 323, 432. HRMS calcd. for: C<sub>28</sub>H<sub>23</sub>Cl<sub>2</sub>S [M+H]<sup>+</sup>: 461.08920, found 461.08909.

**2,2'-(1-P-tolyl-2-(p-tolylthio)ethene-1,2-diyl)dithiophene (3u+4u)**

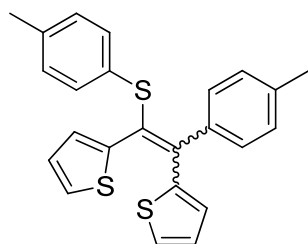

The reaction was conducted with sodium 4-methylbenzenesulfinate (**1b**, 142.4 mg, 0.8 mmol) and 1,2-di(thiophen-2-yl)ethyne (**2g**, 38.1 mg, 0.2 mmol). The crude mixture was purified by flash column chromatography on silica gel (petroleum ether/ethyl acetate = 95:5) to provide 41.3 mg, 51% yield of **3u+4u** as light yellow oil. The ratio of **3u/4u** is 1:1.5.

<sup>1</sup>H NMR (400 MHz, CDCl<sub>3</sub>, ppm) δ 7.32-7.27 (m, 1.56H), 7.21-7.08 (m, 6.08H), 7.02-6.88 (m, 3.9H), 6.79-6.76 (m, 1.47H), 6.63-6.57 (m, 1H), 2.39 (s, 1.8H = 0.6×3H), 2.36 (s, 1.2H = 0.4×3H), 2.25-2.23 (m, 3H); MS (EI) *m/z* (%) 221, 248, 266, 281 (100), 404. HRMS calcd. for: C<sub>24</sub>H<sub>21</sub>S<sub>3</sub> [M+H]<sup>+</sup>: 405.07999, found 405.07980.

### Phenyl(5-phenyloct-4-en-4-yl)sulfane (**3v+4v**)

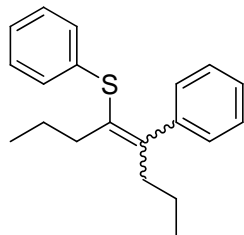

The reaction was conducted with sodium benzenesulfinate (**1a**, 160 mg, 0.8 mmol) and oct-4-yne (**2h**, 29.3  $\mu$ L, 0.2 mmol). The crude mixture was purified by flash column chromatography on silica gel (petroleum ether) to provide 11.9 mg, 20% yield of **3v+4v** as light yellow oil. The ratio of **3v/4v** is 1.2:1.

$^1\text{H}$  NMR (400 MHz,  $\text{CDCl}_3$ , ppm)  $\delta$  7.51-7.49 (m, 0.61H), 7.37-7.26 (m, 4.95H), 7.24-7.12 (m, 4.48H), 2.72 (t,  $J = 7.6$  Hz, 1.1H = 0.275 $\times$ 4H), 2.51 (t,  $J = 7.6$  Hz, 0.9H = 0.225 $\times$ 4H), 2.32 (t,  $J = 7.6$  Hz, 0.9H = 0.225 $\times$ 4H), 1.98 (t,  $J = 7.4$  Hz, 1.1H = 0.275 $\times$ 4H), 1.64-1.58 (m, 0.62H), 1.47-1.30 (m, 3.4H), 0.94-0.84 (m, 4.61H), 0.65 (t,  $J = 7.2$  Hz, 1.41H); MS (EI)  $m/z$  (%) 91, 115, 129, 267, 296 (100).

### 1,1,2,2-Tetraphenylethene

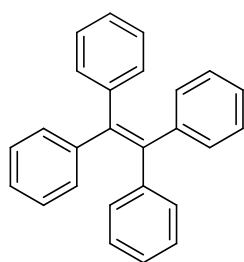

$^1\text{H}$  NMR (400 MHz,  $\text{CDCl}_3$ , ppm)  $\delta$  7.09-7.02 (m, 20H);  $^{13}\text{C}$  NMR (100 MHz,  $\text{CDCl}_3$ , ppm) 143.7, 141.1, 131.3, 127.6, 126.4; MS (EI)  $m/z$  (%) 77, 151, 239, 253, 332 (100).

### References

[1] A. Alfonso, G. Carlo, G. Patrizia, G. Alessandra, B.-Y. Michal, R. Zvi, *Eur. J. Org. Chem.* 2002, 13, 2136.

# $^1\text{H}$ and $^{13}\text{C}$ NMR spectra

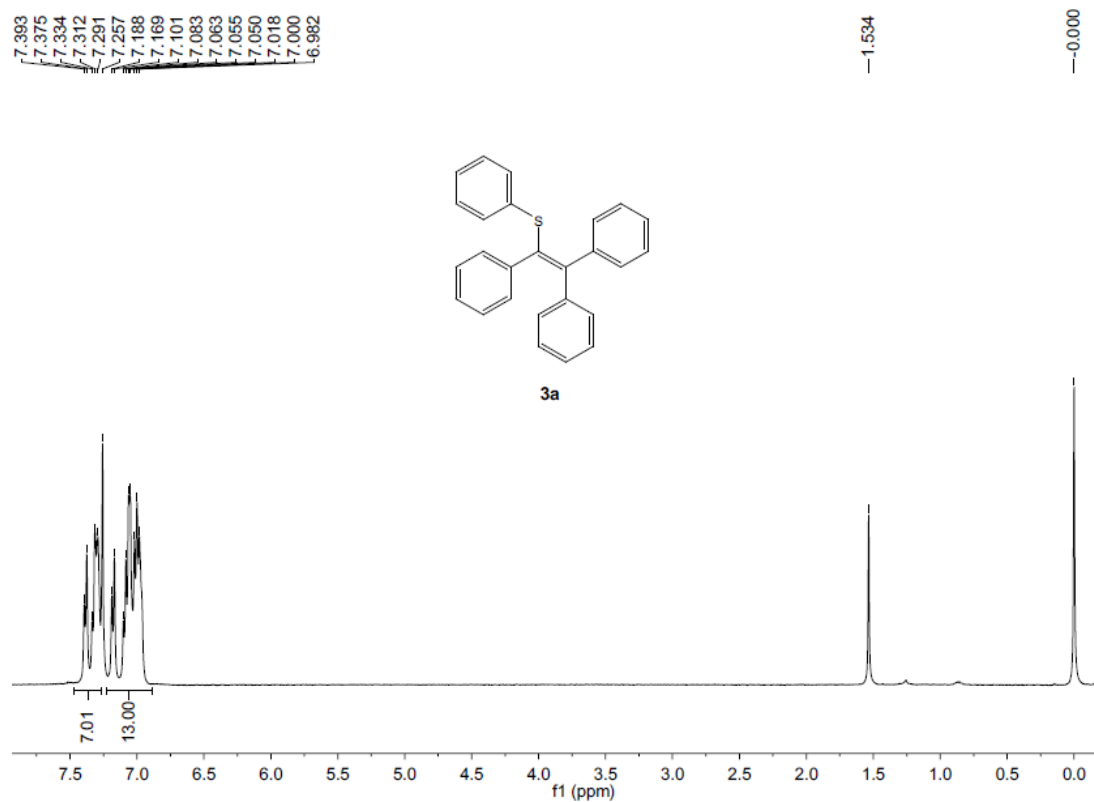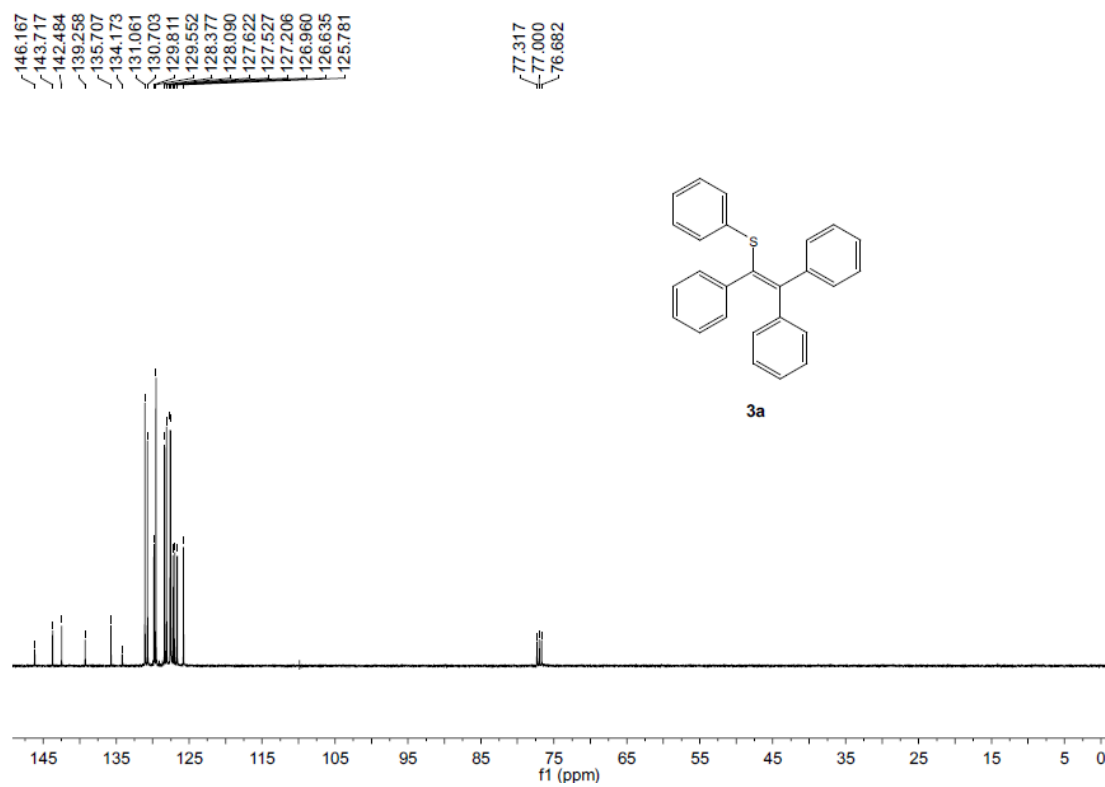

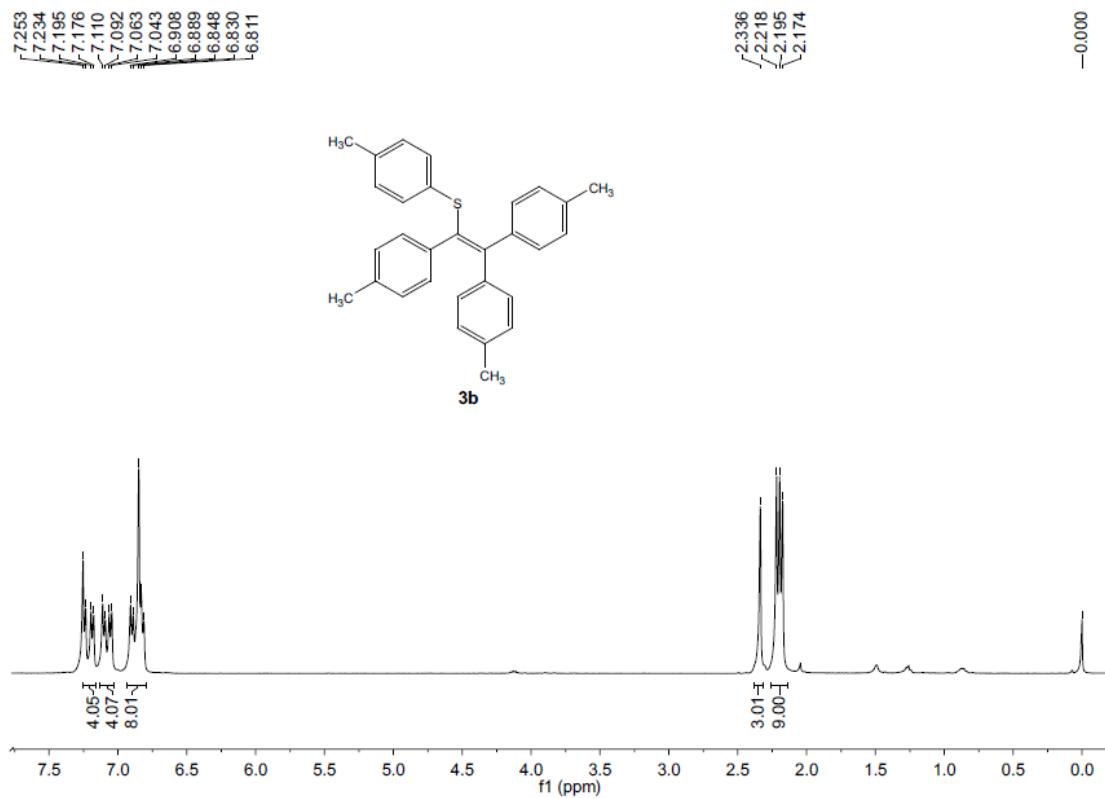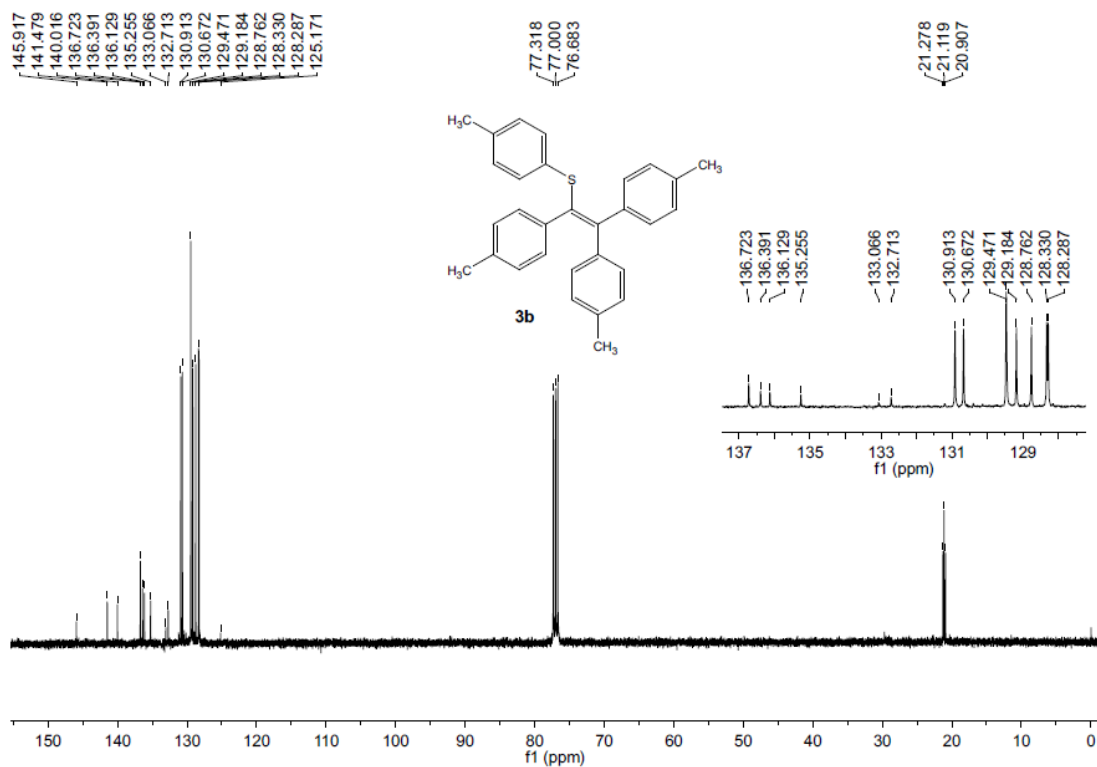



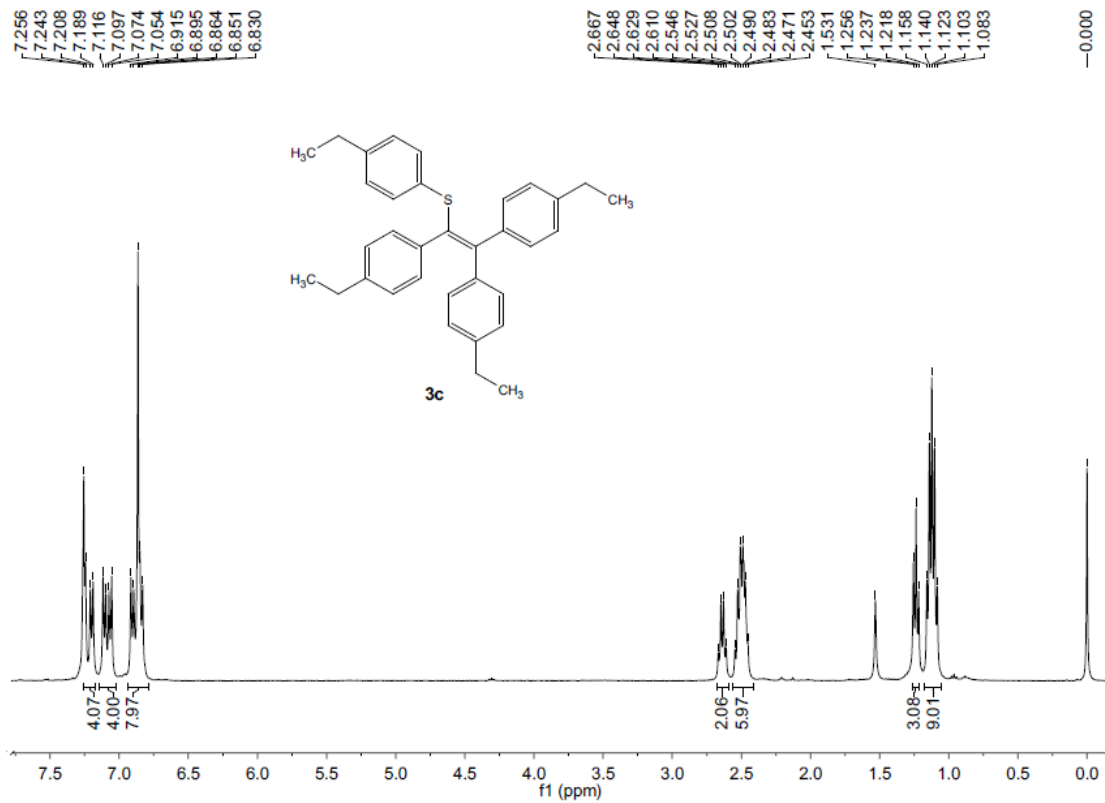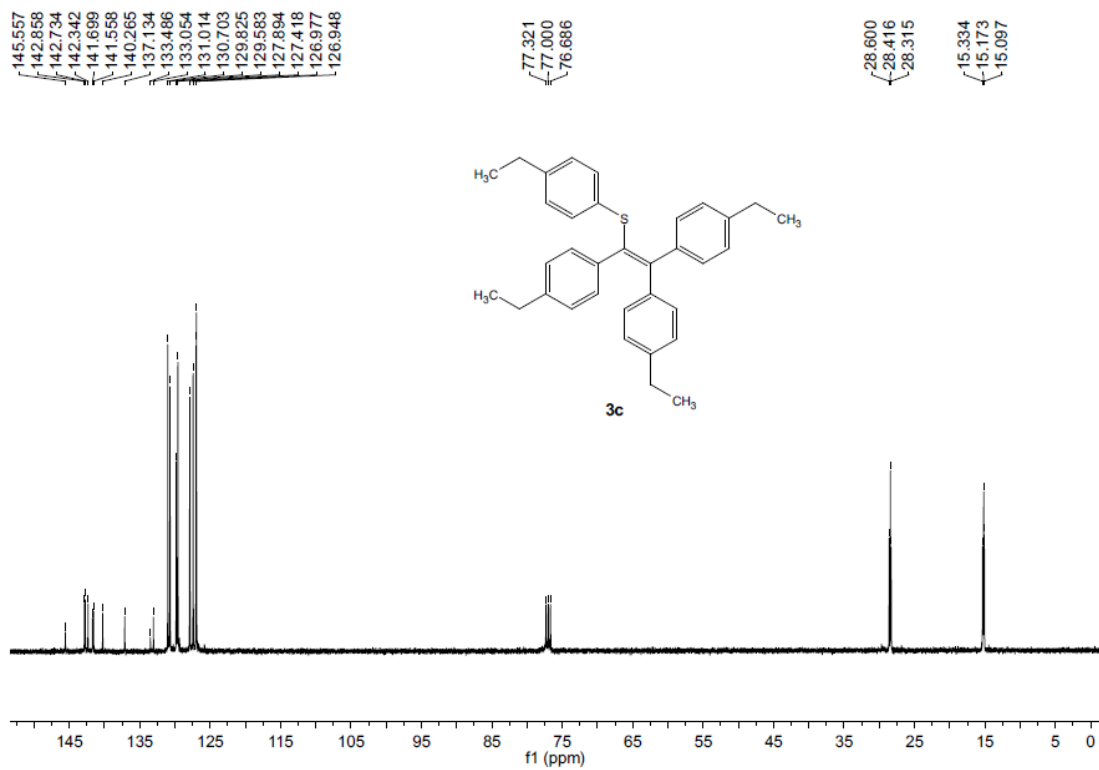

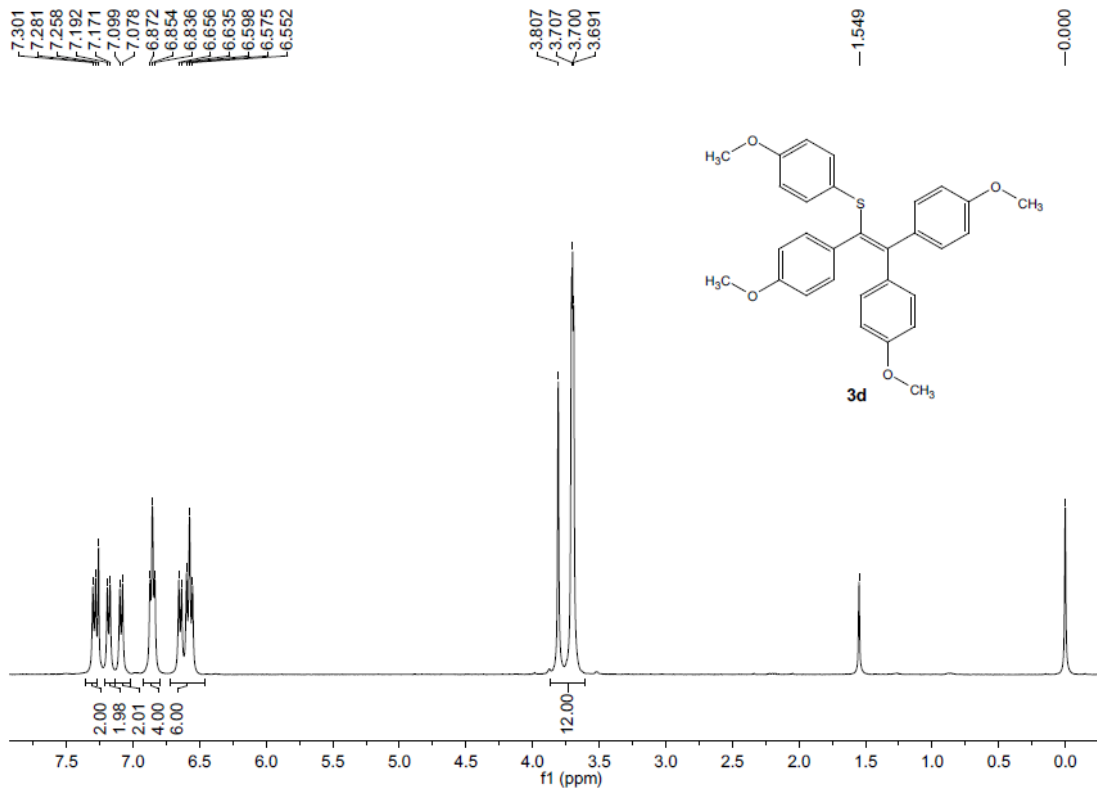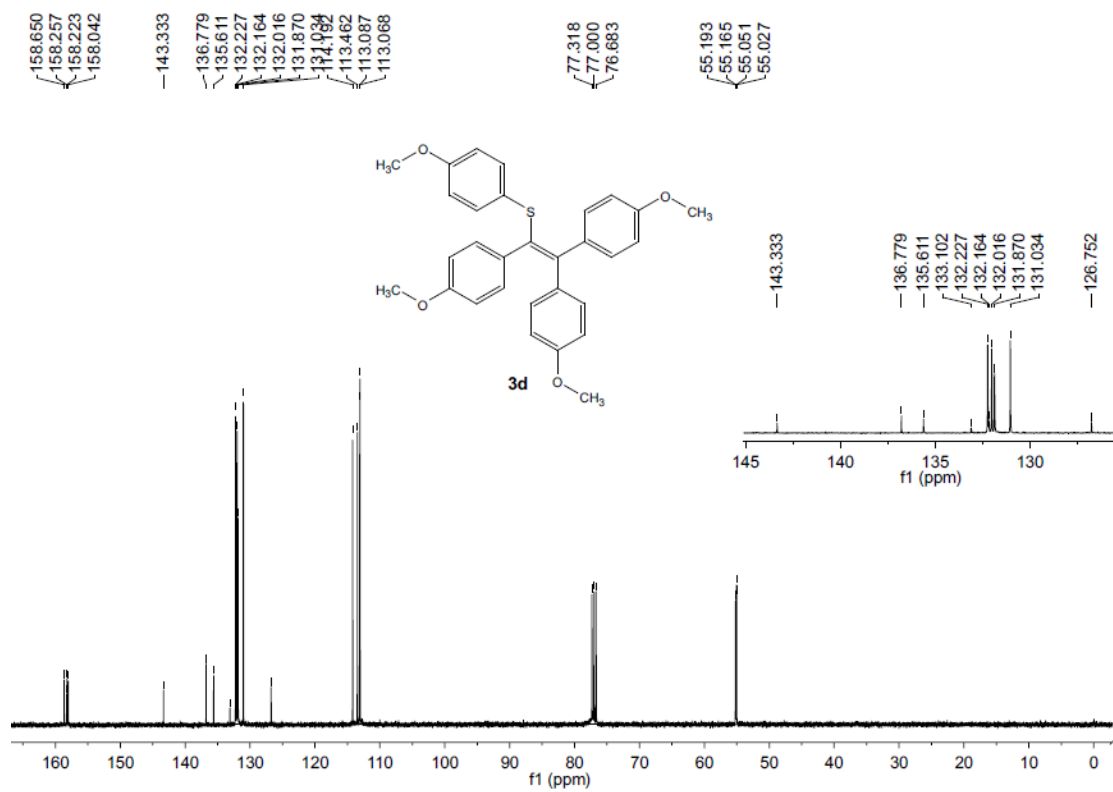

7.336  
7.322  
7.316  
7.302  
7.260  
7.207  
7.193  
7.187  
7.173  
7.128  
7.115  
7.107  
7.094  
7.048  
7.026  
7.005  
6.902  
6.888  
6.862  
6.868  
6.831  
6.809  
6.789  
6.767  
6.743  
6.721

-1.549

-0.000

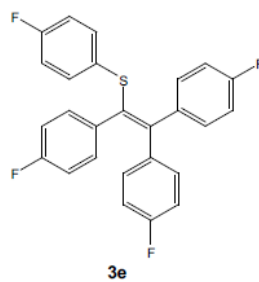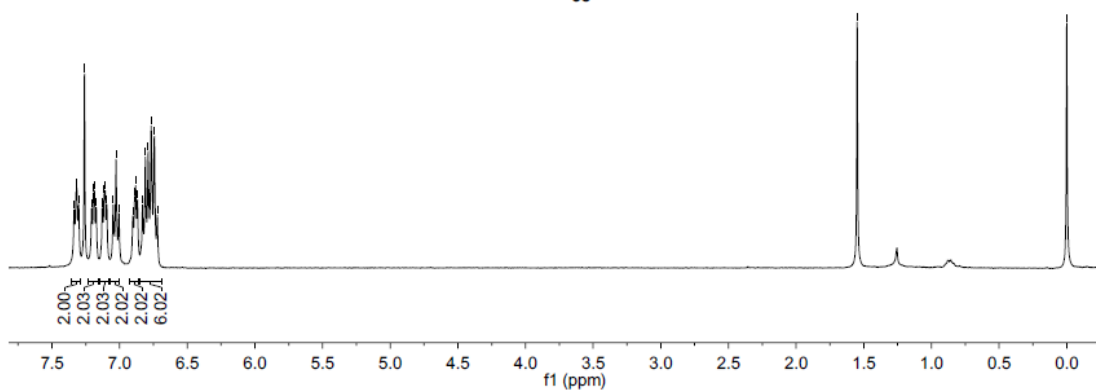

163.333  
163.018  
162.933  
162.816  
160.354  
142.848  
138.050  
134.672  
132.644  
132.563  
132.287  
132.207  
131.413  
131.334  
131.302  
115.683  
115.432  
115.218  
115.039  
114.824

77.317  
77.000  
76.682

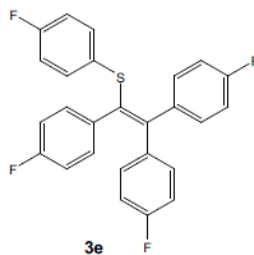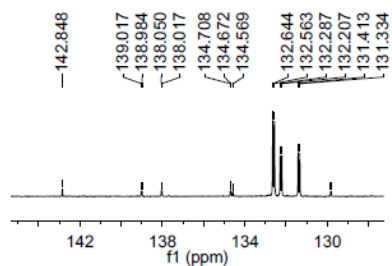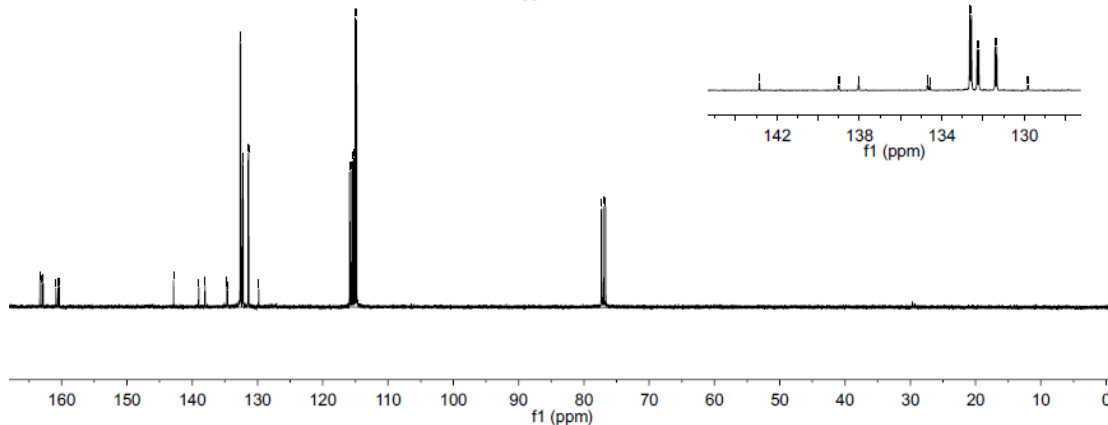

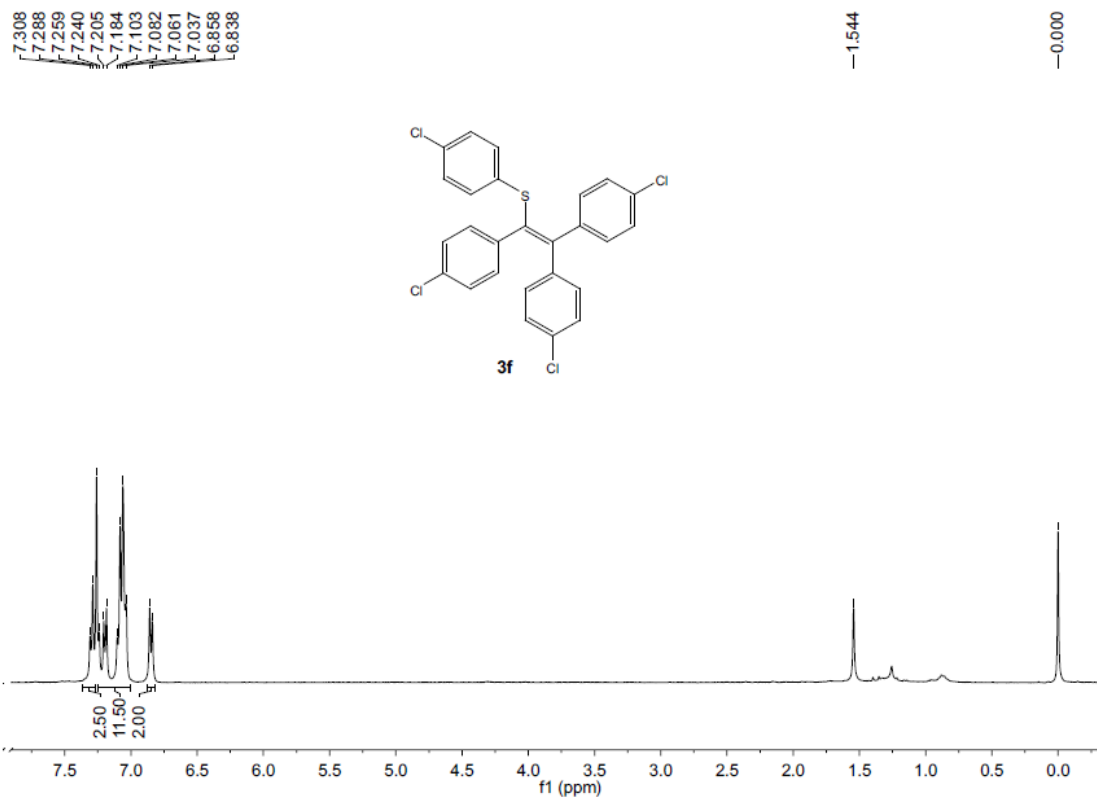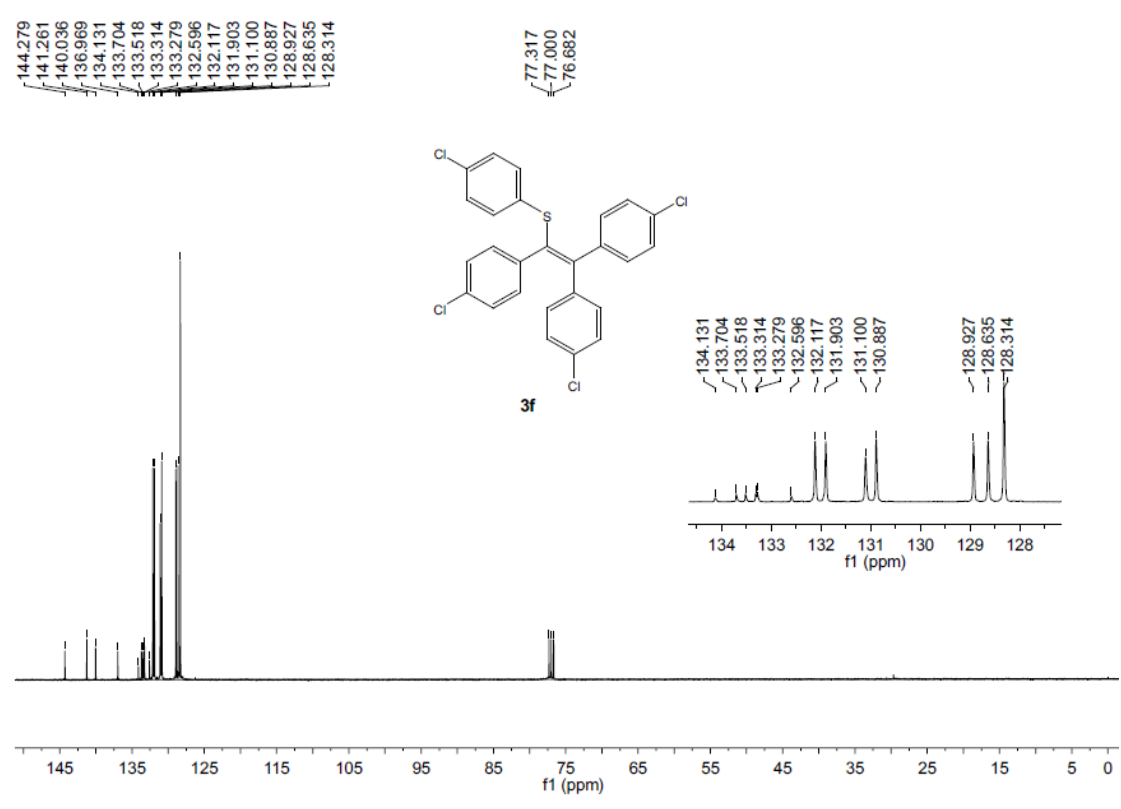

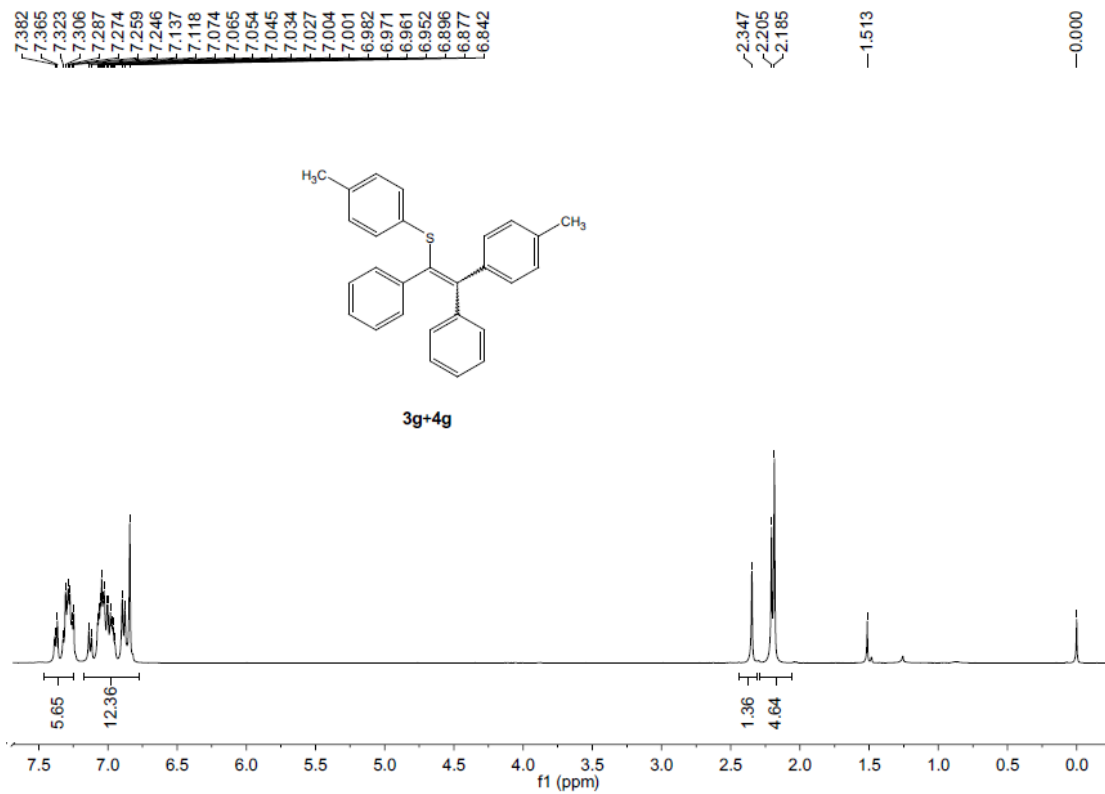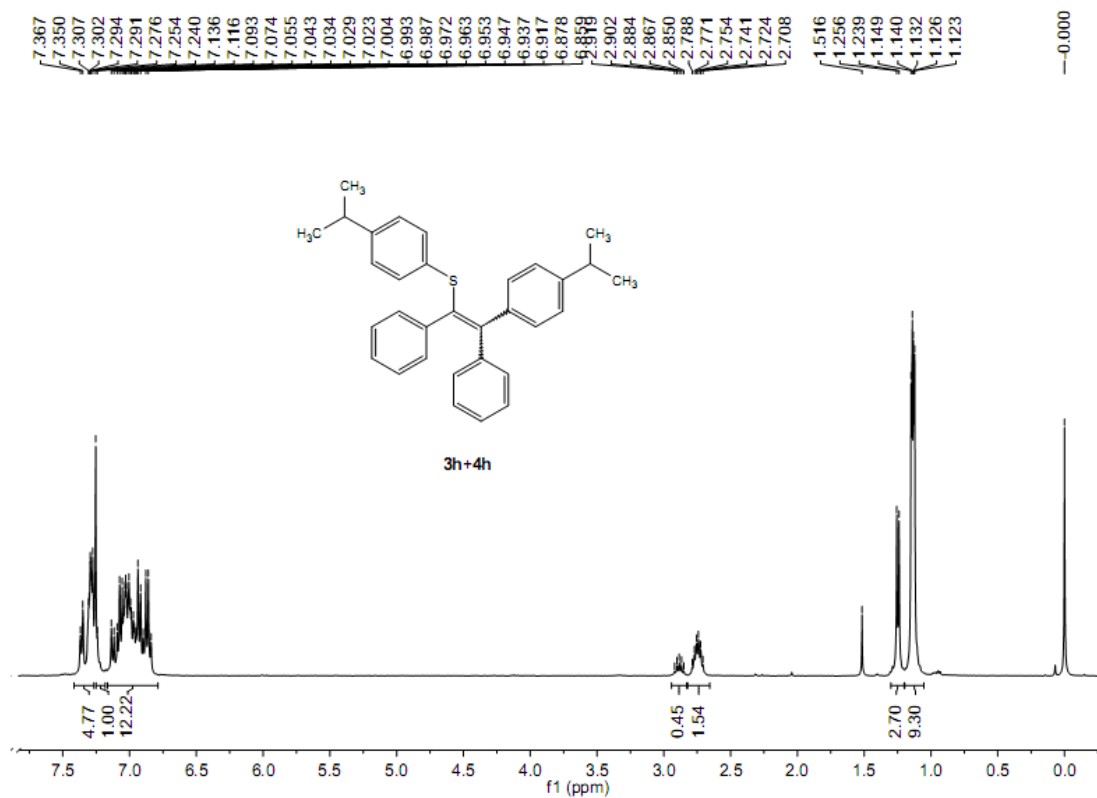

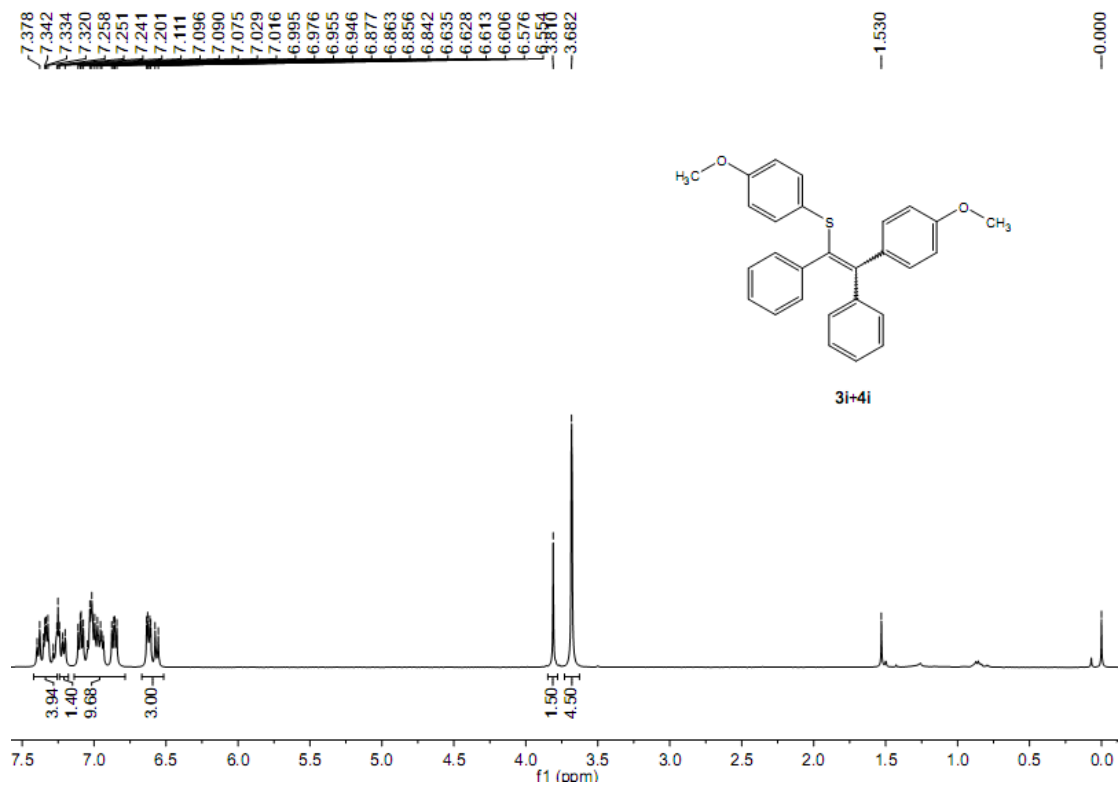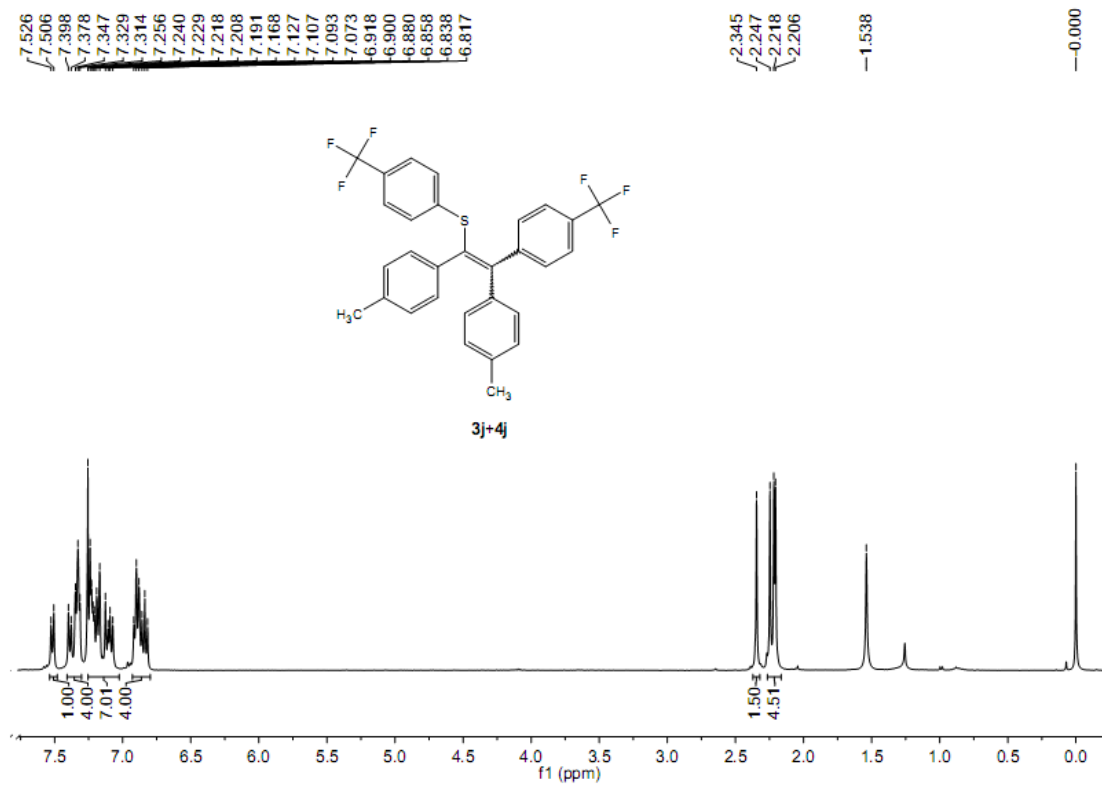

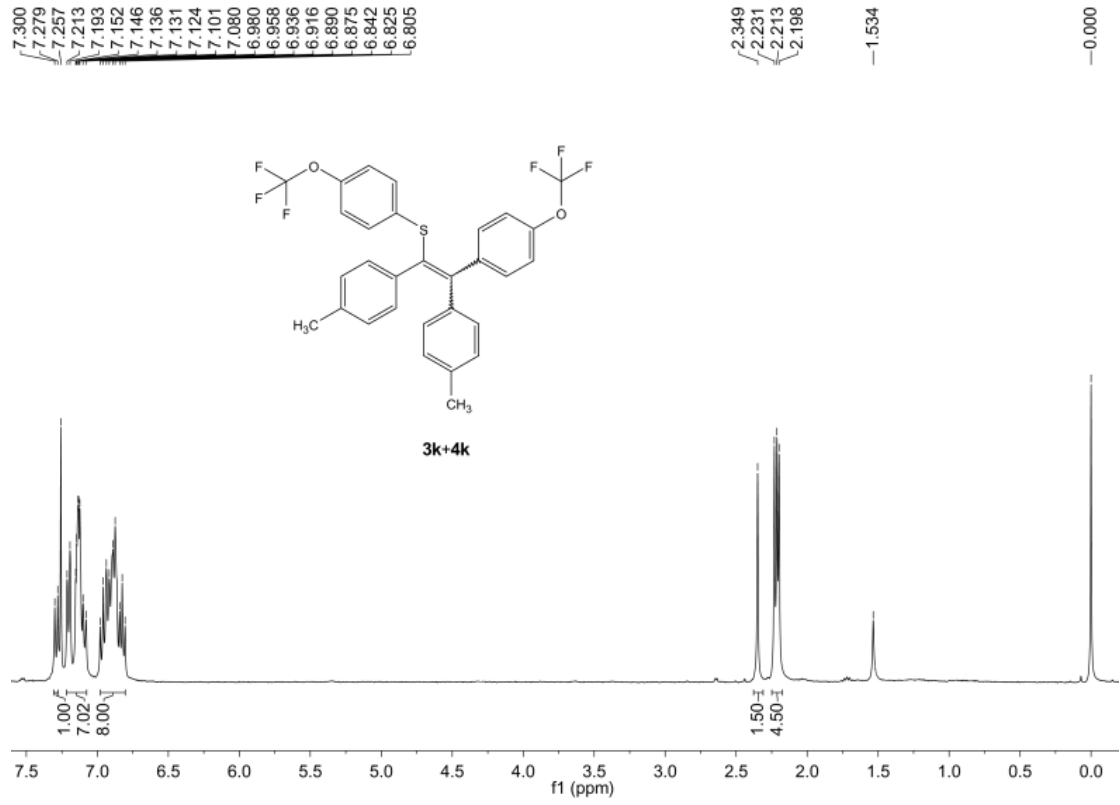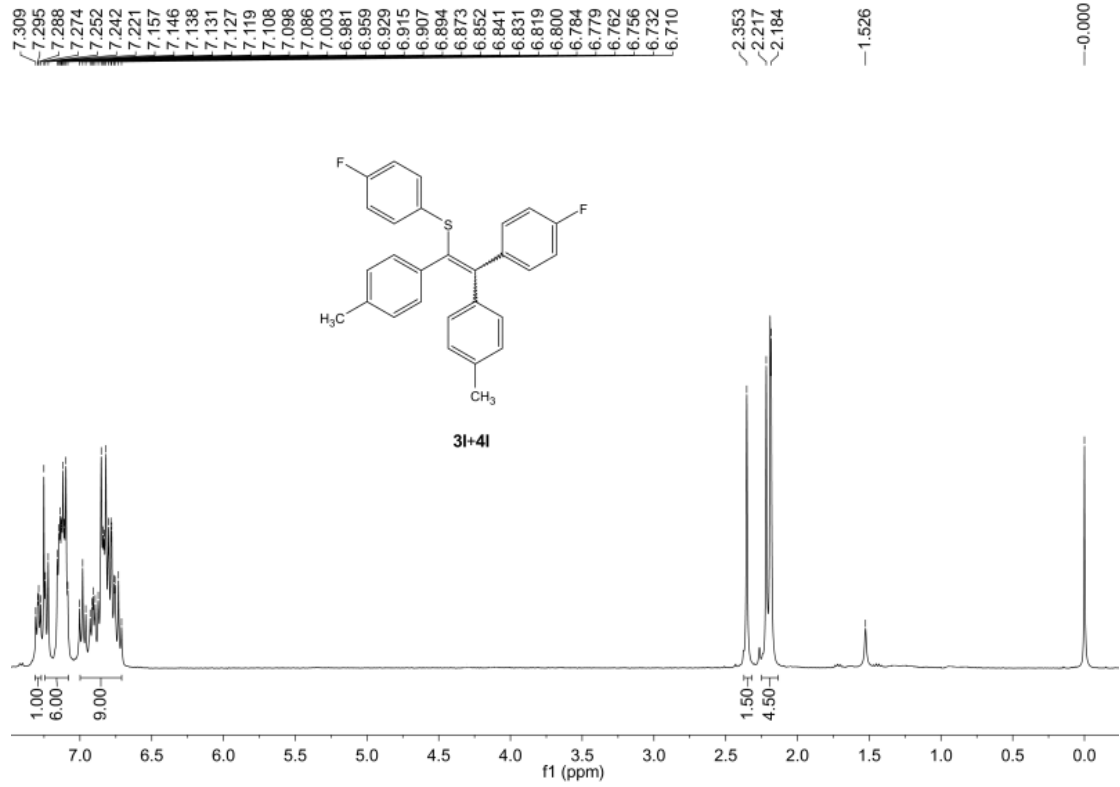

7.259  
7.250  
7.211  
7.190  
7.168  
7.153  
7.134  
7.115  
7.062  
7.035  
7.014  
6.888  
6.866  
6.843  
6.821  
6.801

2.350  
2.231  
2.202

-1.541

-0.000

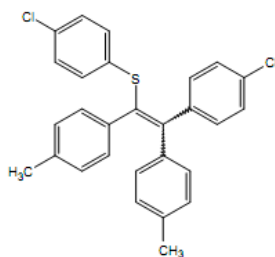

3m+4m

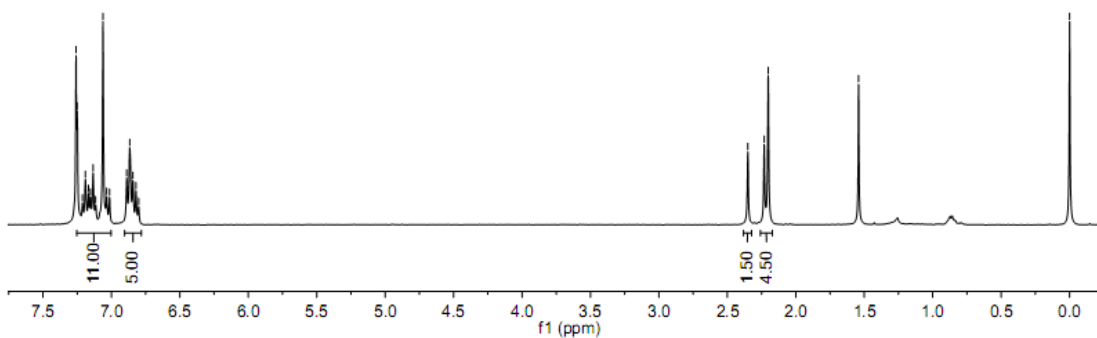

7.418  
7.398  
7.259  
7.221  
7.211  
7.200  
7.189  
7.168  
7.137  
7.130  
7.110  
7.013  
7.008  
6.992  
6.987  
6.888  
6.867  
6.846  
6.827  
6.819  
6.807  
6.800

2.349  
2.232  
2.206

-1.540

-0.000

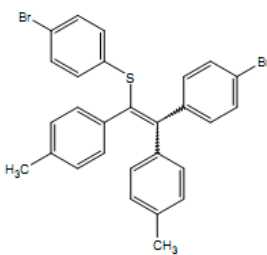

3n+4n

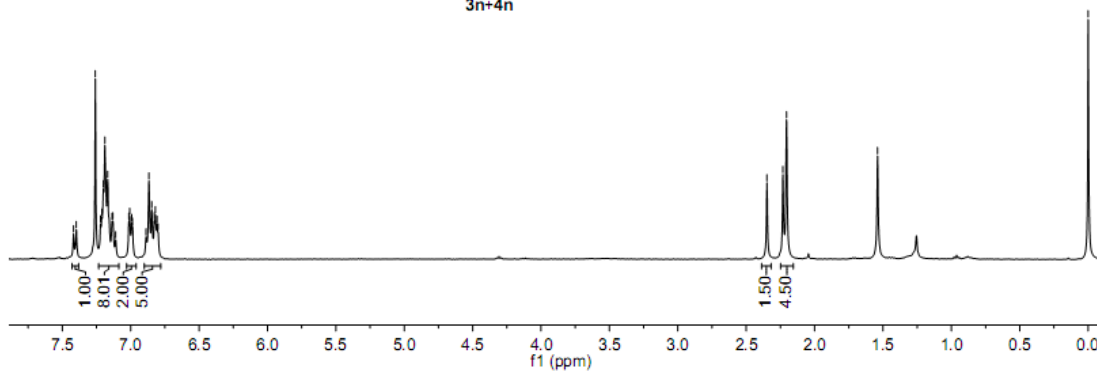



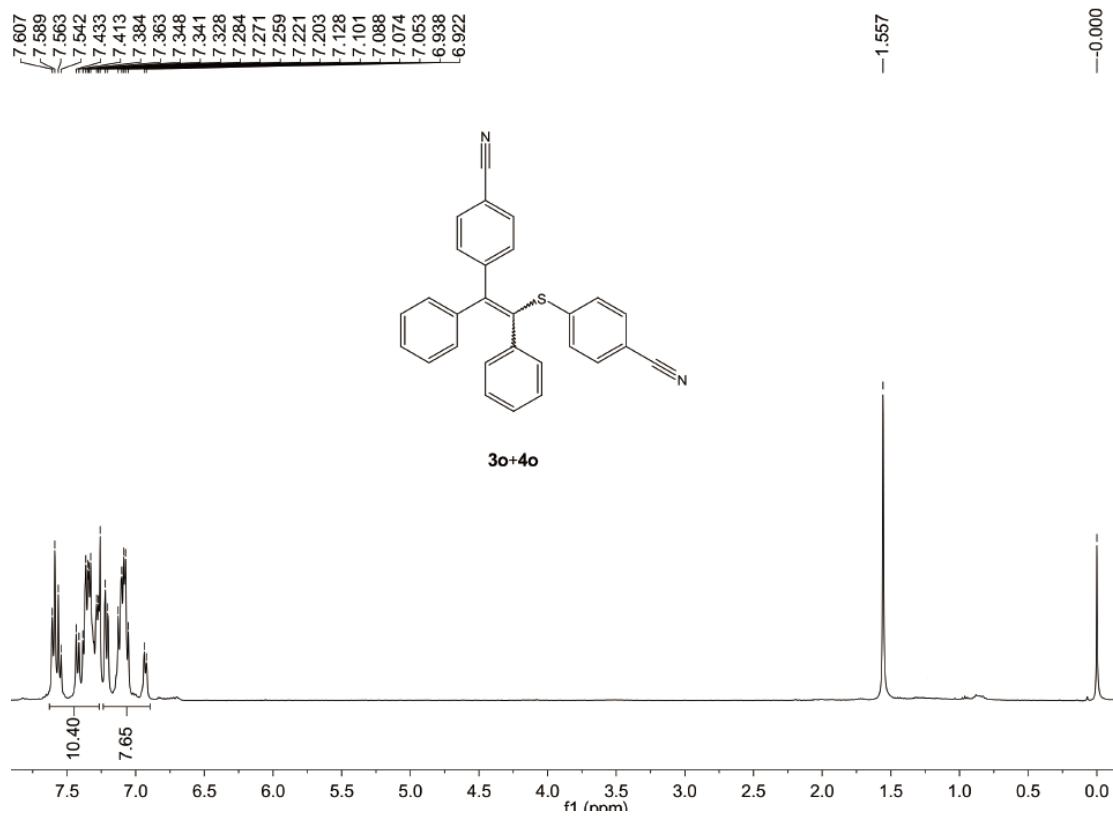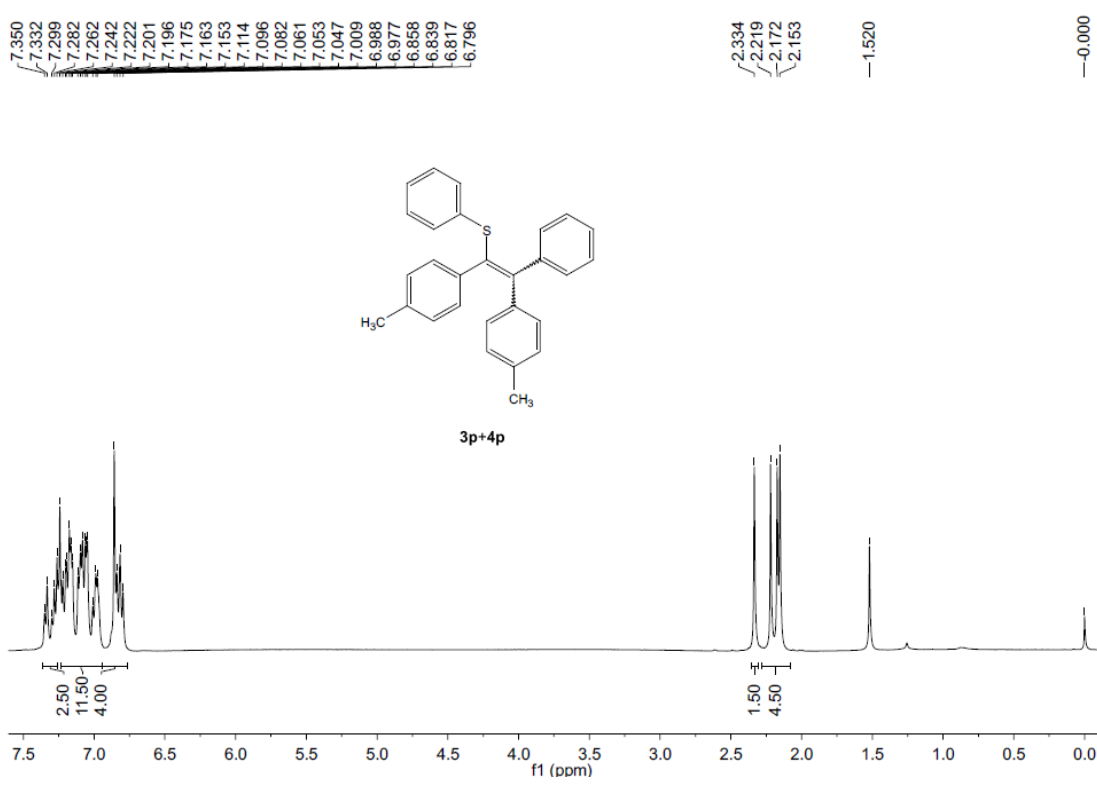

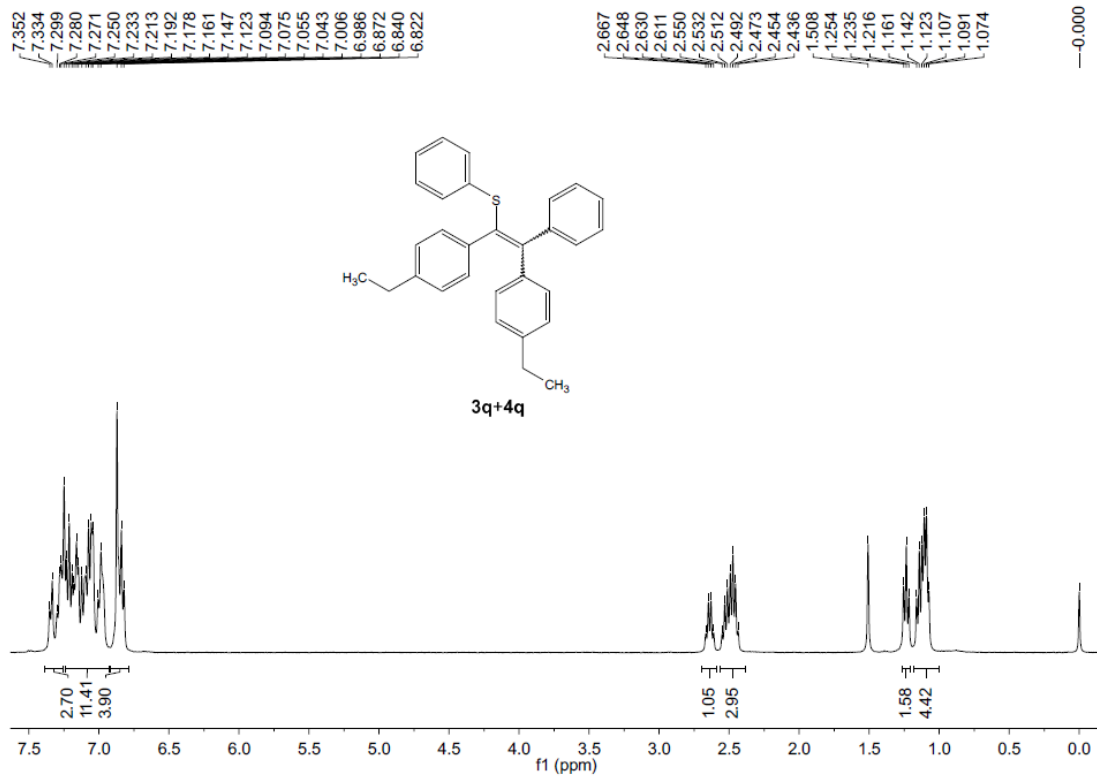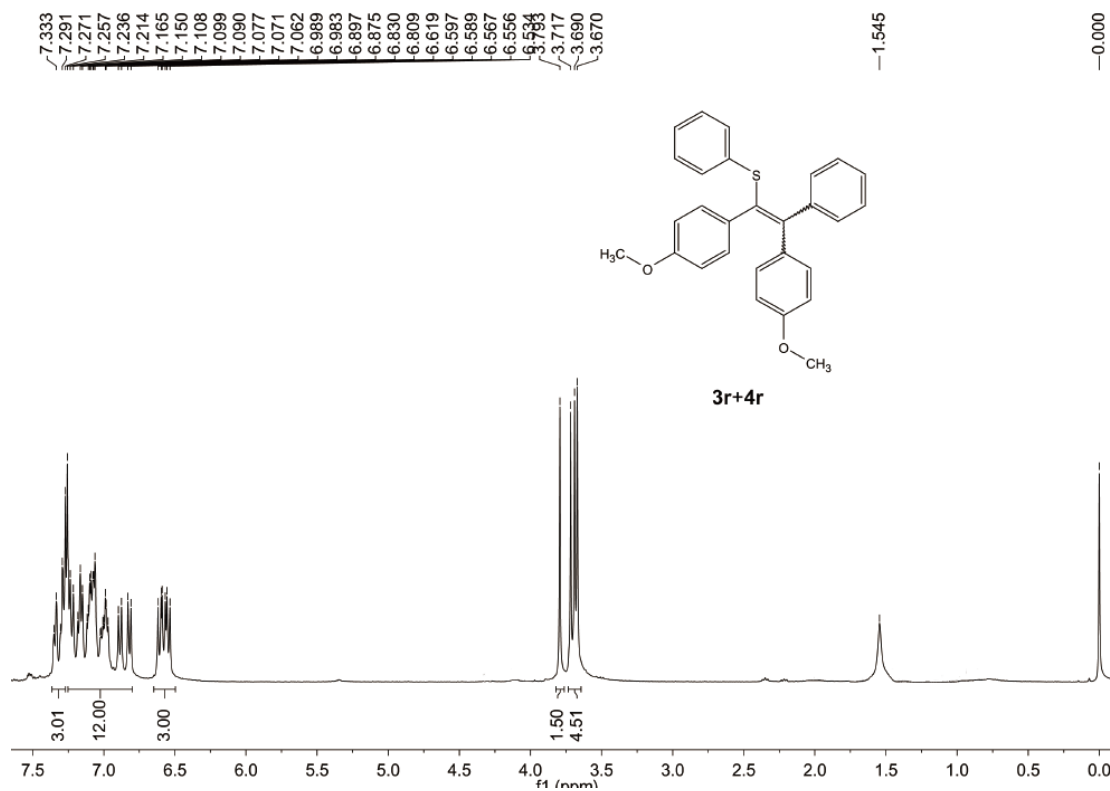

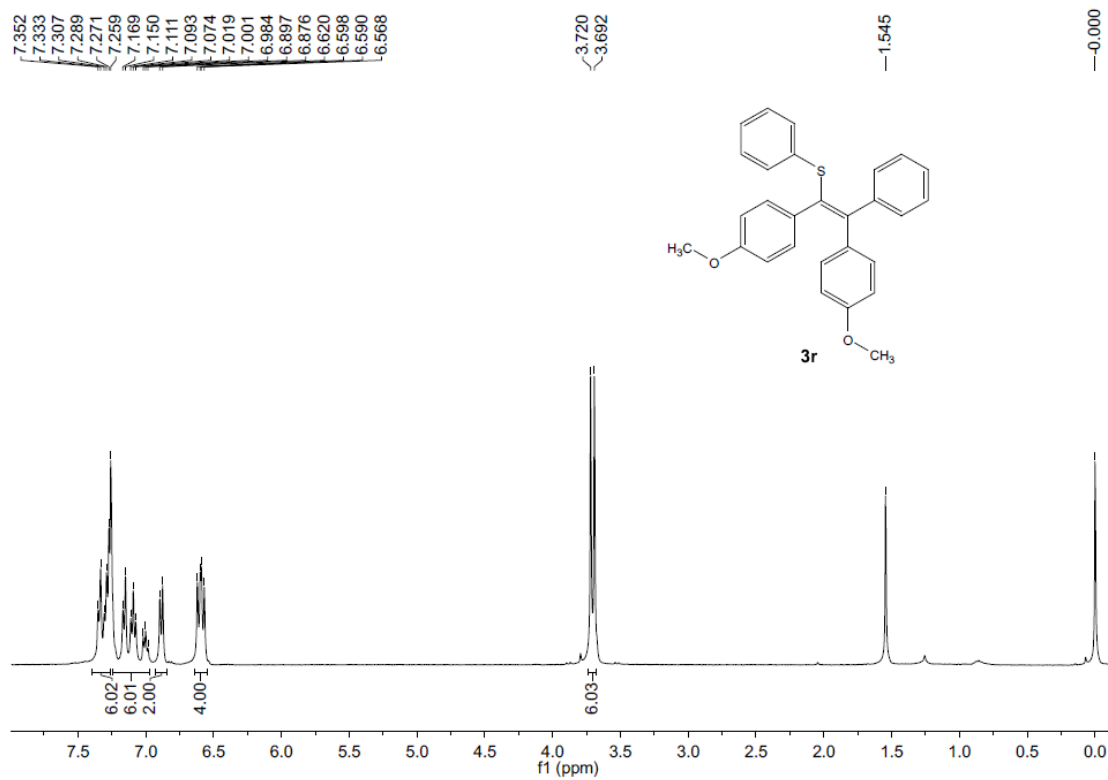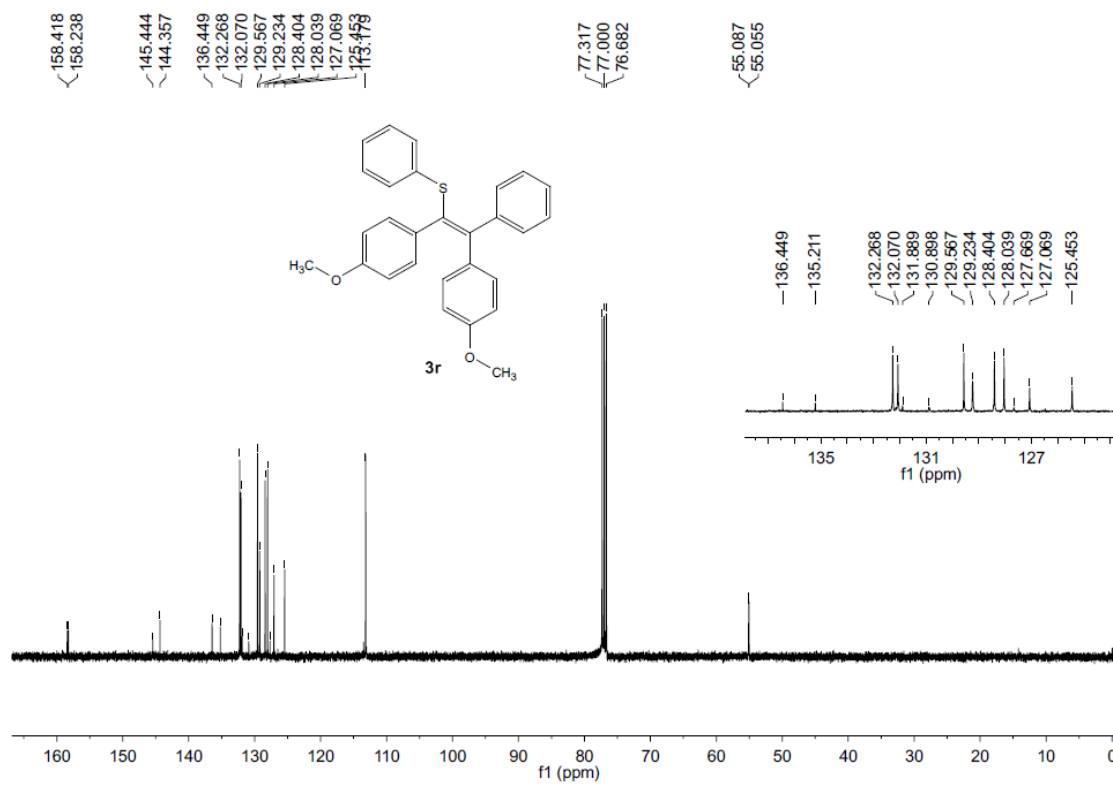

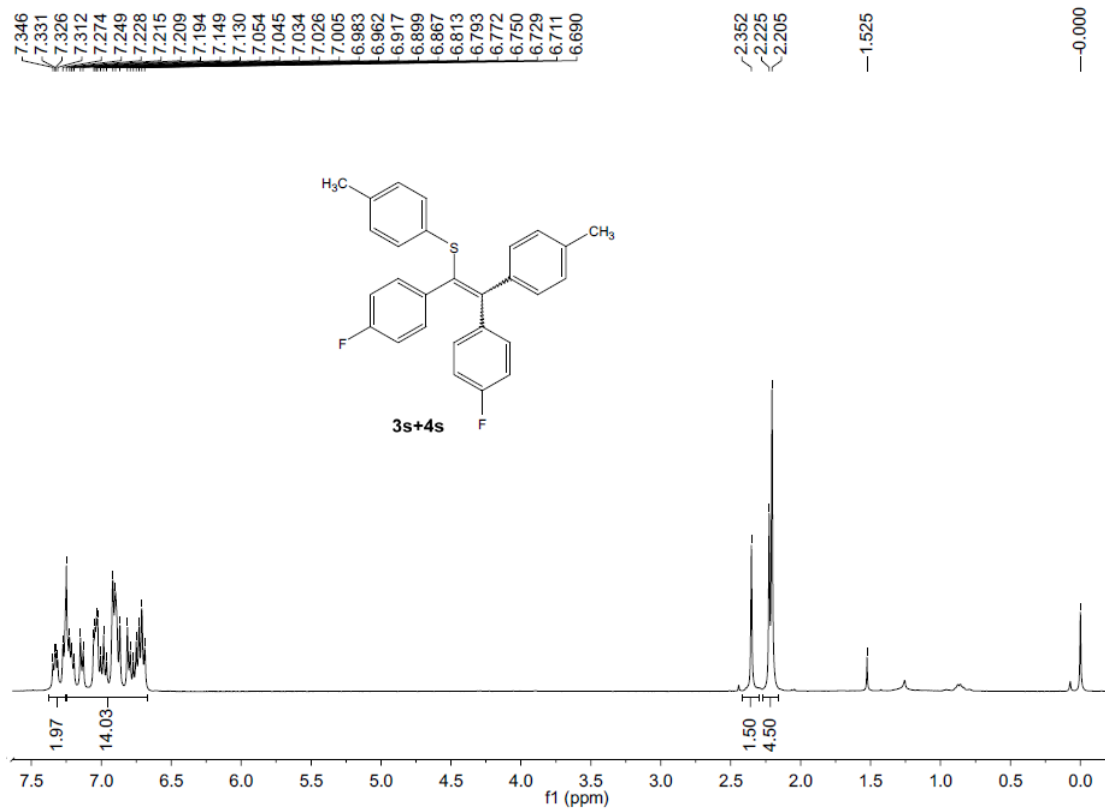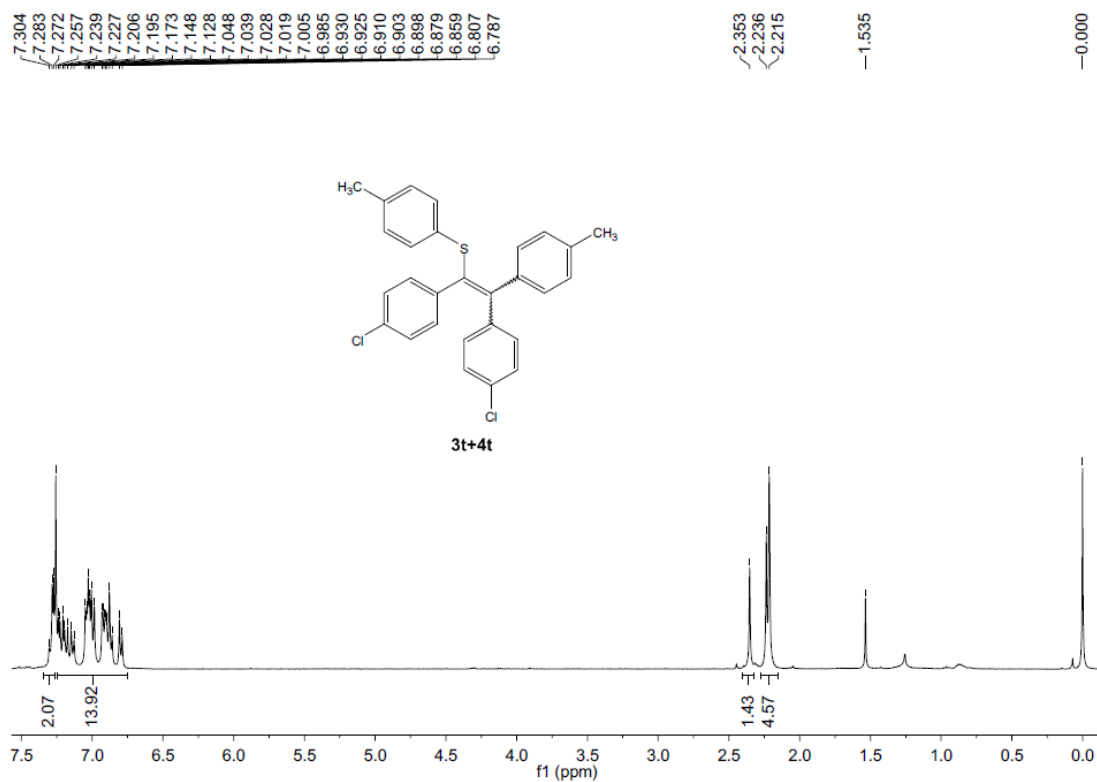

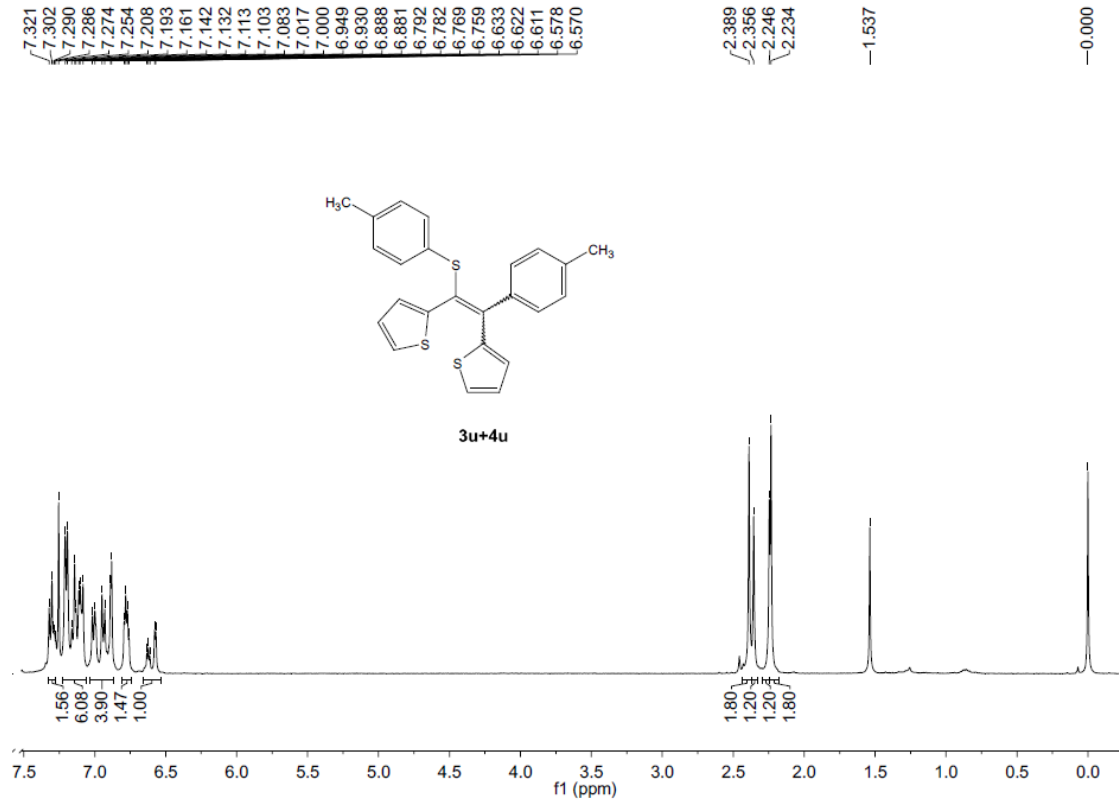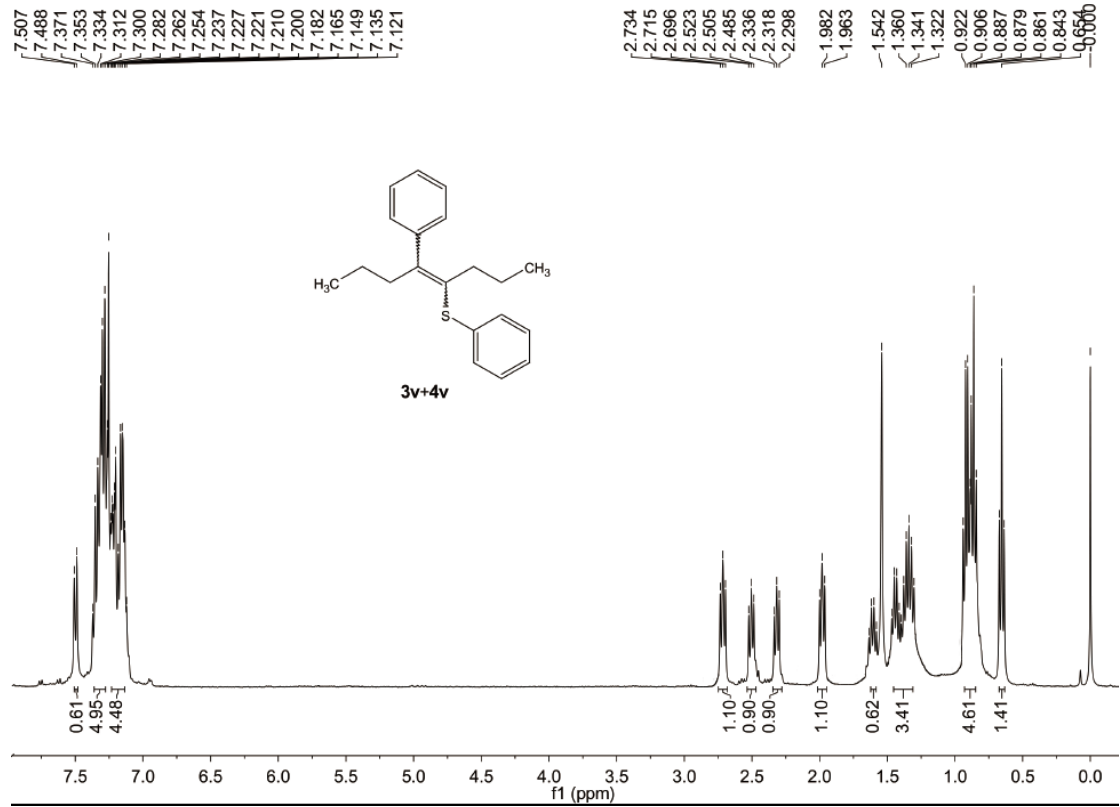

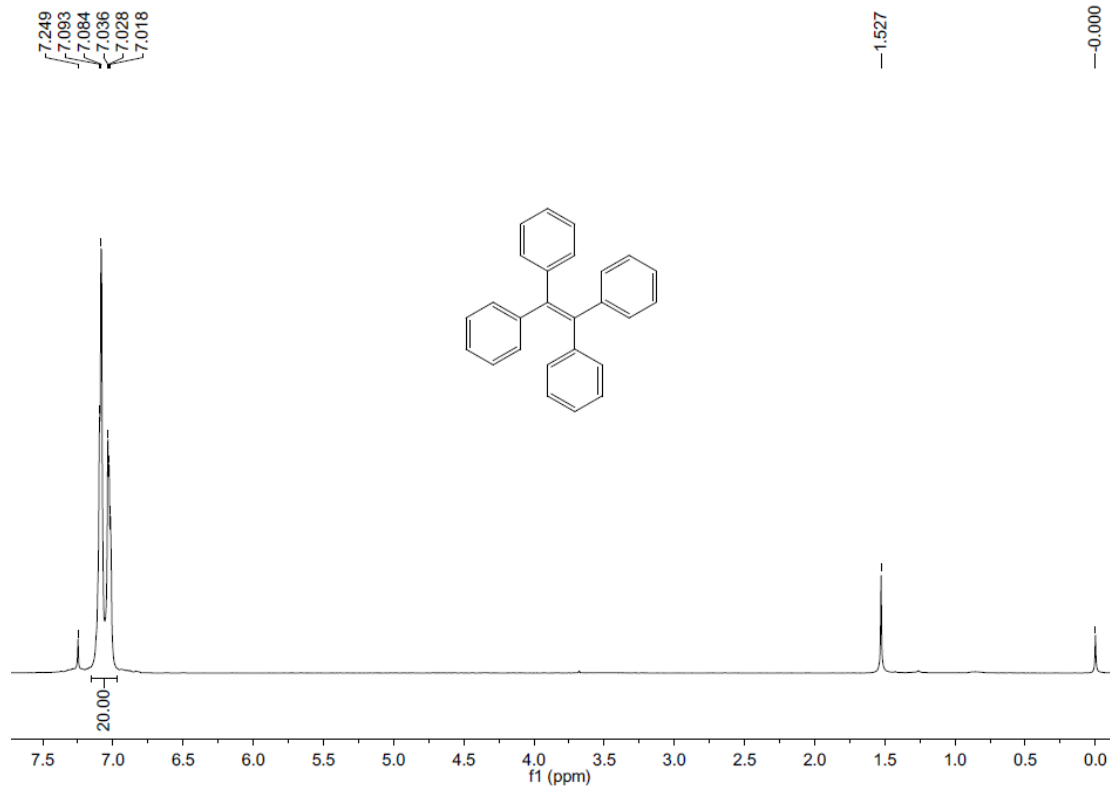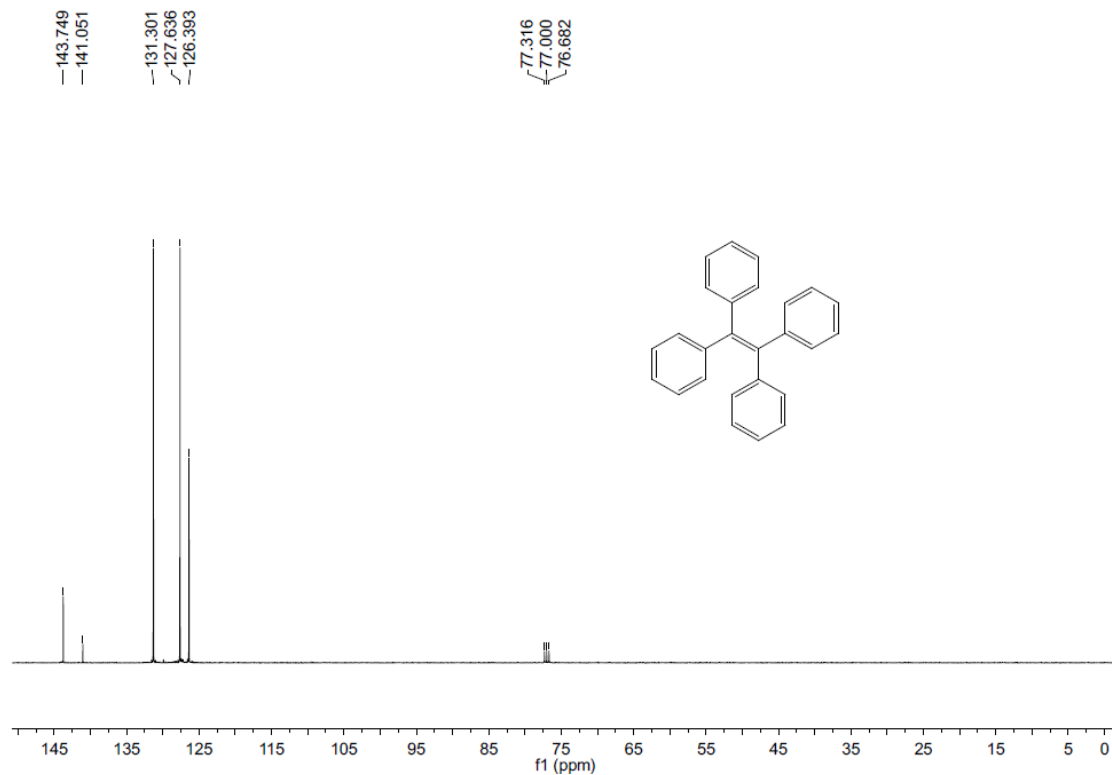

## X-ray crystallographic structures of 3d and 3q

### X-ray crystallographic structures of 3d

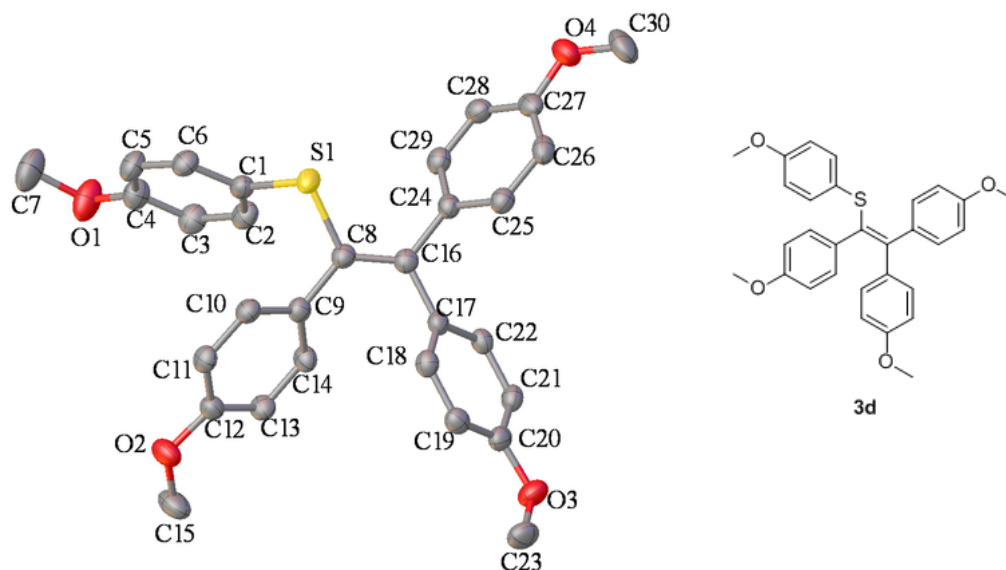

Table 1. Crystal data and structure refinement for **3d**.

|                                   |                                                                                                |
|-----------------------------------|------------------------------------------------------------------------------------------------|
| Identification code               | <b>3d</b>                                                                                      |
| Empirical formula                 | C <sub>30</sub> H <sub>28</sub> O <sub>4</sub> S                                               |
| Formula weight                    | 484.58                                                                                         |
| Temperature                       | 173(2) K                                                                                       |
| Wavelength                        | 0.71073 Å                                                                                      |
| Crystal system, space group       | Monoclinic, P2(1)/c                                                                            |
| Unit cell dimensions              | a = 9.694(3) Å    α = 90°.<br>b = 9.672(3) Å    β = 95.745(3)°.<br>c = 27.021(8) Å    γ = 90°. |
| Volume                            | 2520.8(12) Å <sup>3</sup>                                                                      |
| Z, Calculated density             | 4, 1.277 Mg/m <sup>3</sup>                                                                     |
| Absorption coefficient            | 0.163 mm <sup>-1</sup>                                                                         |
| F(000)                            | 1024                                                                                           |
| Crystal size                      | 0.29 x 0.27 x 0.19 mm                                                                          |
| Theta range for data collection   | 3.02 to 27.46°.                                                                                |
| Limiting indices                  | -11 ≤ h ≤ 12, -12 ≤ k ≤ 12, -35 ≤ l ≤ 35                                                       |
| Reflections collected / unique    | 17290 / 5749 [R(int) = 0.0465]                                                                 |
| Completeness to theta = 27.46     | 99.6 %                                                                                         |
| Absorption correction             | Semi-empirical from equivalents                                                                |
| Max. and min. transmission        | 1.0000 and 0.6142                                                                              |
| Refinement method                 | Full-matrix least-squares on F <sup>2</sup>                                                    |
| Data / restraints / parameters    | 5749 / 0 / 320                                                                                 |
| Goodness-of-fit on F <sup>2</sup> | 1.181                                                                                          |
| Final R indices [I > 2σ(I)]       | R1 = 0.0687, wR2 = 0.1406                                                                      |
| R indices (all data)              | R1 = 0.0790, wR2 = 0.1459                                                                      |
| Largest diff. peak and hole       | 0.376 and -0.315 e. Å <sup>3</sup>                                                             |

### X-ray crystallographic structures of **3q**

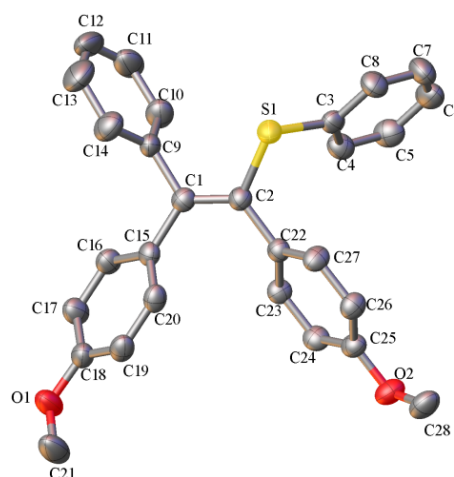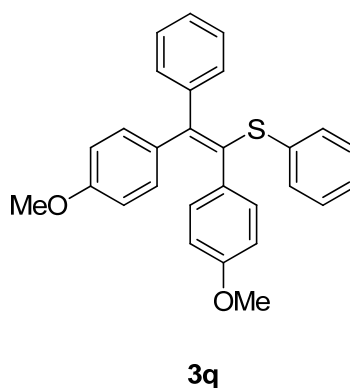

Table 1. Crystal data and structure refinement for **3q**.

|                                   |                                             |                             |
|-----------------------------------|---------------------------------------------|-----------------------------|
| Identification code               | <b>3q</b>                                   |                             |
| Empirical formula                 | $C_{28}H_{24}O_2S$                          |                             |
| Formula weight                    | 424.53                                      |                             |
| Temperature                       | 173.1500 K                                  |                             |
| Wavelength                        | 0.71073 Å                                   |                             |
| Crystal system                    | Monoclinic                                  |                             |
| Space group                       | P 1 21 1                                    |                             |
| Unit cell dimensions              | a = 5.9048(14) Å                            | $\alpha = 90^\circ$ .       |
|                                   | b = 20.852(5) Å                             | $\beta = 94.460(4)^\circ$ . |
|                                   | c = 9.218(2) Å                              | $\gamma = 90^\circ$ .       |
| Volume                            | 1131.6(4) Å <sup>3</sup>                    |                             |
| Z, Density (calculated)           | 2, 1.246 Mg/m <sup>3</sup>                  |                             |
| Absorption coefficient            | 0.165 mm <sup>-1</sup>                      |                             |
| F(000)                            | 448                                         |                             |
| Crystal size                      | 0.22 x 0.15 x 0.1 mm <sup>3</sup>           |                             |
| Theta range for data collection   | 2.955 to 27.470°.                           |                             |
| Index ranges                      | -7<=h<=7, -26<=k<=26, -11<=l<=11            |                             |
| Reflections collected             | 10003                                       |                             |
| Independent reflections           | 4645 [R(int) = 0.0404]                      |                             |
| Completeness to theta = 26.000°   | 99.6 %                                      |                             |
| Absorption correction             | Semi-empirical from equivalents             |                             |
| Max. and min. transmission        | 1.0000 and 0.6949                           |                             |
| Refinement method                 | Full-matrix least-squares on F <sup>2</sup> |                             |
| Data / restraints / parameters    | 4645 / 1 / 282                              |                             |
| Goodness-of-fit on F <sup>2</sup> | 1.079                                       |                             |
| Final R indices [I>2sigma(I)]     | R1 = 0.0471, wR2 = 0.1023                   |                             |
| R indices (all data)              | R1 = 0.0519, wR2 = 0.1055                   |                             |
| Absolute structure parameter      | -0.02(5)                                    |                             |
| Extinction coefficient            | n/a                                         |                             |
| Largest diff. peak and hole       | 0.253 and -0.200 e.Å <sup>-3</sup>          |                             |
